# Supplementary material
Source: MDPI journal article supplement (https://www.mdpi.com/2673-4184/3/4/38)
Supplement: s1 [file s1 › File S1.xlsx]

## Sheet: Absenteeism and MHM
Age	Form	What is your Ethnicity	What is your religion?	Category of school?	Whom do you live with at present?	What is your father’s educational level?	What is your mother’s educational level?	Category of employment of mother?	Category of employment of father?	Practice	Do you use absorbent material during period or menses?	What absorbent material do you use mostly during menstruation?	Do you reuse absorbent materials?	Place of pad store (absorbent materials) in between use?	How do you clean it?	Where do you dry the absorbent material?	Types of pads wrap used for disposing it?	How many times do you change the cloth/pad in a day?	Where do you dispose your pads?	How often do you bath during Menstruation/Period?	What do you use to clean your genital (private part) during your menses?	Abseenteeism	Have you ever absented yourself from school due to menstruation?	How many days did you absent yourself from school?	What are some of the problems for your absent?	What are some of the problems for your absent? /Pains	What are some of the problems for your absent? / Staining dress	What are some of the problems for your absent? /Shyness	What are some of the problems for your absent? /Stigma	What are some of the problems for your absent? /Heavy_bleeding	Do you have concentration problems in class during menstruation?	Are you able to partake in all school activities during menstruation?	Is there enough time in breaks for change of menstrual item?	Are you able to leave class to wash in case of a leak?	How do you buy your sanitary pad?	How were you educated about the menstrual hygiene management?	What are the cultural factors that affects MHM? (Tick all applicable)	What are the cultural factors that affects MHM? (Tick all applicable)/My culture does not talk about menses	What are the cultural factors that affects MHM? (Tick all applicable)/ beliefs	What are the cultural factors that affects MHM? (Tick all applicable)/Taboos	What are the cultural factors that affects MHM? (Tick all applicable)/Prohibition from cooking in the home	What are the cultural factors that affects MHM? (Tick all applicable)/No sex with husband	What are the cultural factors that affects MHM? (Tick all applicable)/Others	What are the religious factors that affects MHM?(Tick all applicable)	What are the religious factors that affects MHM?(Tick all applicable) /Prohibition on attending religious ceremonies	What are the religious factors that affects MHM?(Tick all applicable) /Prohibition from touching the holy books (Bible or Qur’an)	What are the religious factors that affects MHM?(Tick all applicable) /Visiting religious places	What are the religious factors that affects MHM?(Tick all applicable) /Others
15 to 19 years	JHS 3	Dagomba	Islam	Public	Relatives	College diploma & above	College di	Public sector employment	Private sector employment		Yes	Commercially made sanitary pad	No				Plastic bag	Three and more	Dustbin	Twice daily	Water and soap		No								Yes	Sometimes	Yes	Yes	Father	School health	Taboos	0	0	1	0	0	0	Prohibition on attending religious ceremonies	1	0	0	0
Below 15 years	JHS 3	Gonja	Islam	Public	Relatives	College diploma & above	Secondary school	Self employed	Private sector employment		Yes	Commercially made sanitary pad	No				Plastic bag	Twice	Dustbin	Three times a day	Water and soap		No								No	Sometimes	No	Yes	Self	School health	Taboos	0	0	1	0	0	0	Prohibition from touching the holy books (Bible or Qur’an)	0	1	0	0
15 to 19 years	JHS 3	Others	Islam	Public	With my mother and father	College diploma & above	College di	Public sector employment	Public sector employment		Yes	Commercially made sanitary pad	No				Plastic bag	Three and more	Dustbin	Twice daily	Water and soap		No								No	Sometimes	Yes	Yes	Mother	Family	Taboos No sex with husband	0	0	1	0	1	0		0	0	0	0
15 to 19 years	JHS 2	Dagomba	Islam	Public	Mother only	No formal education	No formal education	Self employed	Self employed		Yes	Commercially made sanitary pad	No				Plastic bag	Three and more	Dustbin	Twice daily	Water and soap		No								No	Others	Yes	Yes	Mother	School health	My culture does not talk about menses Taboos Others	1	0	1	0	0	1	Prohibition from touching the holy books (Bible or Qur’an) Visiting religious places Others	0	1	1	1
15 to 19 years	JHS 1	Others	Christianity	Public	Mother only	Basic education	Secondary school	Unemployed	Self employed		Yes	Cloth	Yes	In the bath room	Soap and water	Inside the room	Not wrap	Once	Others	Daily	Only with water		No								No	Always	Yes	Yes	Self	School health	beliefs Taboos	0	1	1	0	0	0	Prohibition from touching the holy books (Bible or Qur’an) Visiting religious places	0	1	1	0
15 to 19 years	JHS 2	Dagomba	Islam	Public	Mother only	No formal education	No formal education	Self employed	Self employed		Yes	Commercially made sanitary pad	No				Plastic bag	Twice	Toilet	Twice daily	Water and soap		No								No	Others	Yes	Yes	Self	School health	beliefs Taboos Prohibition from cooking in the home	0	1	1	1	0	0	Prohibition on attending religious ceremonies Prohibition from touching the holy books (Bible or Qur’an) Visiting religious places Others	1	1	1	1
15 to 19 years	JHS 1	Mamprusi	Christianity	Public	Mother only	Basic education	Secondary school	Unemployed	Public sector employment		Yes	Commercially made sanitary pad	No				Papers	Once	Drain	Daily	Water and soap		No								No	Sometimes	Yes	Yes	Self	School health	My culture does not talk about menses Taboos	1	0	1	0	0	0	Prohibition on attending religious ceremonies Visiting religious places	1	0	1	0
Below 15 years	JHS 1	Dagomba	Islam	Public	Relatives	Secondary school	Secondary school	Self employed	Public sector employment		Yes	Commercially made sanitary pad	No				Papers	Twice	Dustbin	Twice daily	Only with water		No								Yes	Sometimes	Yes	Yes	Mother	Family	Taboos Prohibition from cooking in the home No sex with husband	0	0	1	1	1	0	Prohibition from touching the holy books (Bible or Qur’an) Visiting religious places	0	1	1	0
15 to 19 years	JHS 1	Dagomba	Islam	Public	With my mother and father	Basic education	No formal education	Unemployed	Self employed		Yes	Cloth	Yes	In the bath room	Soap and water	Sunlights	Other	Twice	Toilet	Twice daily	Only with water		No								Yes	Sometimes	Yes	Yes	Father	Family	Taboos Prohibition from cooking in the home No sex with husband	0	0	1	1	1	0	Prohibition from touching the holy books (Bible or Qur’an) Visiting religious places	0	1	1	0
Below 15 years	JHS 1	Mamprusi	Islam	Public	With my mother and father	No formal education	No formal education	Self employed	Self employed		Yes	Commercially made sanitary pad	No				Plastic bag	Three and more	Toilet	Twice daily	Water and soap		No								Yes	Sometimes	Yes	Yes	Mother	School health	My culture does not talk about menses beliefs Taboos	1	1	1	0	0	0	Prohibition on attending religious ceremonies Prohibition from touching the holy books (Bible or Qur’an)	1	1	0	0
15 to 19 years	JHS 1	Dagomba	Islam	Public	With my mother and father	Basic education	No formal education	Self employed	Self employed		Yes	Commercially made sanitary pad	No				Plastic bag	Three and more	Toilet	Twice daily	Water and soap		No								No	Sometimes	Yes	Yes	Self	School health	beliefs Taboos	0	1	1	0	0	0	Prohibition on attending religious ceremonies Prohibition from touching the holy books (Bible or Qur’an) Visiting religious places	1	1	1	0
Below 15 years	JHS 2	Dagomba	Islam	Public	Mother only	Basic education	No formal education	Unemployed	Self employed		Yes	Commercially made sanitary pad	No				Plastic bag	Twice	Dustbin	Twice daily	Water and soap		No								No	Others	Yes	Yes	Self	School health	beliefs Taboos	0	1	1	0	0	0	Prohibition on attending religious ceremonies Prohibition from touching the holy books (Bible or Qur’an) Visiting religious places	1	1	1	0
15 to 19 years	JHS 1	Dagomba	Islam	Public	With my mother and father	No formal education	No formal education	Self employed	Self employed		Yes	Cloth	Yes	In the bath room	Soap and water	Inside the room	Not wrap	Once	Others	Twice daily	Water and soap		No								No	Others	Yes	Yes	Self	School health	My culture does not talk about menses Taboos	1	0	1	0	0	0	Prohibition on attending religious ceremonies Prohibition from touching the holy books (Bible or Qur’an) Visiting religious places	1	1	1	0
15 to 19 years	JHS 2	Dagomba	Islam	Public	With my mother and father	Secondary school	No formal education	Self employed	Public sector employment		Yes	Commercially made sanitary pad	No				Plastic bag	Twice	Dustbin	Twice daily	Only with water		Yes	2	Staining dress	0	1	0	0	0	No	Sometimes	Yes	Yes	Father	School health	Taboos Prohibition from cooking in the home	0	0	1	1	0	0	Prohibition from touching the holy books (Bible or Qur’an) Visiting religious places	0	1	1	0
Below 15 years	JHS 3	Others	Christianity	Public	Father only	Basic education	Secondary school	Private sector employement	Public sector employment		Yes	Commercially made sanitary pad	No				Plastic bag	Twice	Dustbin	Twice daily	Water and soap		Yes	1	Others	0	1	1	1	1	No	Others	Yes	Yes	Father	Family	Taboos	0	0	1	0	0	0	Prohibition from touching the holy books (Bible or Qur’an) Visiting religious places	0	1	1	0
Below 15 years	JHS 1	Dagomba	Islam	Public	With my mother and father	Basic education	No formal education	Unemployed	Self employed		Yes	Commercially made sanitary pad	No				Plastic bag	Three and more	Dustbin	Twice daily	Only with water		Yes	2	Pains	1	1	0	0	0	No	Sometimes	Yes	Yes	Mother	Others	beliefs Taboos	0	1	1	0	0	0		0	0	0	0
15 to 19 years	JHS 3	Dagomba	Islam	Public	With my mother and father	No formal education	No formal education	Self employed	Self employed		Yes	Cloth	Yes	Separately	Soap and water	Sunlights	Not wrap	Three and more	Others	Twice daily	Water and soap		No								No	Always	Yes	Yes	Self	School health	Taboos Others	0	0	1	0	0	1	Prohibition from touching the holy books (Bible or Qur’an) Visiting religious places Others	0	1	1	1
15 to 19 years	JHS 3	Dagomba	Islam	Public	With my mother and father	Basic education	Basic education	Self employed	Public sector employment		Yes	Commercially made sanitary pad	No				Plastic bag	Twice	Dustbin	Twice daily	Water and soap		No								No	Always	Yes	Yes	Mother	Family	Taboos Others	0	0	1	0	0	1	Prohibition from touching the holy books (Bible or Qur’an) Visiting religious places Others	0	1	1	1
15 to 19 years	JHS 1	Dagomba	Islam	Public	Relatives	No formal education	Basic education	Self employed	Self employed		Yes	Commercially made sanitary pad	No				Plastic bag	Twice	Dustbin	Twice daily	Water and soap		Yes	4	Others	0	0	0	0	1	Yes	Sometimes	Yes	Yes	Mother	Family	Taboos	0	0	1	0	0	0	Visiting religious places	0	0	1	0
Below 15 years	JHS 3	Dagomba	Islam	Public	With my mother and father	No formal education	Basic education	Self employed	Self employed		Yes	Commercially made sanitary pad	Yes	Separately	Soap and water	Sunlights	Not wrap	Twice	Others	Twice daily	Only with water		No								No	Sometimes	No	Yes	Mother	Family	Taboos Others	0	0	1	0	0	1	Prohibition from touching the holy books (Bible or Qur’an) Visiting religious places Others	0	1	1	1
Below 15 years	JHS 1	Dagomba	Islam	Public	With my mother and father	No formal education	No formal education	Private sector employement	Private sector employment		Yes	Commercially made sanitary pad	No				Plastic bag	Twice	Toilet	Three times a day	Only with water		Yes	4	Others	0	1	0	0	1	No	Sometimes	Yes	Yes	Mother	School health	My culture does not talk about menses beliefs Taboos Prohibition from cooking in the home No sex with husband Others	1	1	1	1	1	1	Prohibition on attending religious ceremonies Prohibition from touching the holy books (Bible or Qur’an) Visiting religious places Others	1	1	1	1
Below 15 years	JHS 2	Dagomba	Islam	Public	With my mother and father	Secondary school	No formal education	Self employed	Public sector employment		Yes	Commercially made sanitary pad	No				Plastic bag	Twice	Toilet	Twice daily	Water and soap		Yes	1	Others	1	0	0	0	1	No	Sometimes	No	No	Mother	Family	My culture does not talk about menses beliefs Taboos Prohibition from cooking in the home No sex with husband Others	1	1	1	1	1	1	Prohibition on attending religious ceremonies Prohibition from touching the holy books (Bible or Qur’an) Visiting religious places Others	1	1	1	1
Below 15 years	JHS 1	Dagomba	Islam	Public	With my mother and father	Basic education	Basic education	Self employed	Self employed		Yes	Commercially made sanitary pad	No				Plastic bag	Three and more	Dustbin	Twice daily	Only with water		Yes	1	Others	1	0	0	0	1	No	Always	Yes	Yes	Father	School health	Taboos	0	0	1	0	0	0	Prohibition on attending religious ceremonies Prohibition from touching the holy books (Bible or Qur’an) Visiting religious places	1	1	1	0
Below 15 years	JHS 3	Dagomba	Islam	Public	With my mother and father	College diploma & above	Basic education	Self employed	Public sector employment		Yes	Cloth	No				Plastic bag	Twice	Dustbin	Twice daily	Water and soap		Yes	3	Pains	1	1	0	0	0	Yes	Sometimes	Yes	Yes	Mother	Family	Taboos	0	0	1	0	0	0	Prohibition from touching the holy books (Bible or Qur’an)	0	1	0	0
Below 15 years	JHS 3	Dagomba	Islam	Public	With my mother and father	Basic education	No formal education	Self employed	Self employed		Yes	Commercially made sanitary pad	Yes	Separately	Only water	Sunlights	Plastic bag	Three and more	Dustbin	Twice daily	Only with water		No								Yes	Sometimes	Yes	Yes	Mother	School health	Taboos	0	0	1	0	0	0	Prohibition from touching the holy books (Bible or Qur’an) Visiting religious places	0	1	1	0
15 to 19 years	JHS 2	Dagomba	Islam	Private	With my mother and father	Secondary school	Secondary school	Public sector employment	Public sector employment		Yes	Commercially made sanitary pad	No				Plastic bag	Twice	Others	Twice daily	Water and soap		No								Yes	Sometimes	Yes	Yes	Mother	Family	beliefs Taboos	0	1	1	0	0	0	Prohibition from touching the holy books (Bible or Qur’an) Visiting religious places Others	0	1	1	1
Below 15 years	JHS 1	Dagomba	Islam	Private	With my mother and father	Secondary school	Basic education	Self employed	Self employed		Yes	Commercially made sanitary pad	No				Plastic bag	Twice	Toilet	Twice daily	Only with water		No								No	Sometimes	Yes	Yes	Mother	School health	Taboos	0	0	1	0	0	0	Prohibition from touching the holy books (Bible or Qur’an)	0	1	0	0
15 to 19 years	JHS 1	Gonja	Islam	Private	Relatives	No formal education	No formal education	Self employed	Self employed		Yes	Commercially made sanitary pad	No				Not wrap	Three and more	Others	Twice daily	Only with water		No								Yes	Sometimes	Yes	Yes	Mother	Family	Taboos Prohibition from cooking in the home	0	0	1	1	0	0	Prohibition from touching the holy books (Bible or Qur’an) Visiting religious places	0	1	1	0
15 to 19 years	JHS 2	Dagomba	Islam	Private	With my mother and father	Basic education	No formal education	Self employed	Self employed		Yes	Commercially made sanitary pad	No				Not wrap	Three and more	Toilet	Three times a day	Water and soap		No								No	Sometimes	Yes	Yes	Mother	Others	Taboos	0	0	1	0	0	0	Prohibition from touching the holy books (Bible or Qur’an) Visiting religious places	0	1	1	0
Below 15 years	JHS 1	Gonja	Islam	Private	Mother only	No formal education	Basic education	Self employed	Self employed		Yes	Commercially made sanitary pad	No				Plastic bag	Twice	Others	Twice daily	Tissue paper		No								Yes	Sometimes	Yes	Yes	Mother	Family	Taboos Prohibition from cooking in the home No sex with husband	0	0	1	1	1	0	Prohibition from touching the holy books (Bible or Qur’an) Visiting religious places	0	1	1	0
15 to 19 years	JHS 1	Dagomba	Islam	Private	With my mother and father	College diploma & above	No formal education	Self employed	Public sector employment		Yes	Commercially made sanitary pad	Yes	Separately	Only water	Sunlights	Plastic bag	Twice	Dustbin	Twice daily	Only with water		No								No	Sometimes	Yes	Yes	Mother	School health	Taboos	0	0	1	0	0	0	Prohibition from touching the holy books (Bible or Qur’an)	0	1	0	0
15 to 19 years	JHS 1	Dagomba	Islam	Private	Mother only	College diploma & above	No formal education	Self employed	Public sector employment		No										Water and soap		No								No	Sometimes	Yes	Yes	Mother	School health	Taboos	0	0	1	0	0	0	Prohibition from touching the holy books (Bible or Qur’an)	0	1	0	0
15 to 19 years	JHS 1	Dagomba	Islam	Private	Mother only	Secondary school	No formal education	Self employed	Self employed		No										Tissue paper		No								No	Sometimes	Yes	Yes	Mother	School health	beliefs Taboos	0	1	1	0	0	0	Prohibition from touching the holy books (Bible or Qur’an)	0	1	0	0
15 to 19 years	JHS 3	Dagomba	Islam	Private	With my mother and father	Basic education	Secondary school	Self employed	Self employed		Yes	Commercially made sanitary pad	No				Plastic bag	Twice	Open field	Twice daily	Only with water		No								No	Sometimes	Yes	Yes	Mother	School health	Taboos	0	0	1	0	0	0	Prohibition from touching the holy books (Bible or Qur’an) Visiting religious places	0	1	1	0
Below 15 years	JHS 1	Gonja	Islam	Private	Mother only	No formal education	No formal education	Self employed	Self employed		Yes	Commercially made sanitary pad	No				Plastic bag	Three and more	Dustbin	Twice daily	Only with water		No								No	Sometimes	No	No	Mother	Family	My culture does not talk about menses Taboos Prohibition from cooking in the home	1	0	1	1	0	0	Prohibition on attending religious ceremonies Prohibition from touching the holy books (Bible or Qur’an) Visiting religious places	1	1	1	0
Below 15 years	JHS 1	Dagomba	Islam	Public	With my mother and father	No formal education	No formal education	Public sector employment	Self employed		Yes	Cloth	Yes	In the bath room	Only water	Inside the room	Other	Twice	Others	Three times a day	Only with water		Yes	2	Staining dress	0	1	0	0	0	Yes	Always	Yes	Yes	Self	School health	beliefs Taboos	0	1	1	0	0	0	Prohibition from touching the holy books (Bible or Qur’an) Visiting religious places	0	1	1	0
15 to 19 years	JHS 1	Dagomba	Islam	Private	With my mother and father	Basic education	No formal education	Unemployed	Self employed		Yes	Commercially made sanitary pad	No				Plastic bag	Twice	Toilet	Twice daily	Only with water		No								No	Sometimes	No	No	Mother	Others	Taboos Prohibition from cooking in the home No sex with husband	0	0	1	1	1	0	Prohibition from touching the holy books (Bible or Qur’an) Visiting religious places Others	0	1	1	1
15 to 19 years	JHS 1	Gonja	Islam	Private	Mother only	No formal education	Secondary school	Self employed	Self employed		Yes	Commercially made sanitary pad	No				Plastic bag	Three and more	Dustbin	Twice daily	Water and soap		No								No	Sometimes	Yes	Yes	Mother	School health	Taboos	0	0	1	0	0	0	Prohibition from touching the holy books (Bible or Qur’an)	0	1	0	0
15 to 19 years	JHS 2	Dagomba	Islam	Private	With my mother and father	No formal education	No formal education	Self employed	Self employed		Yes	Commercially made sanitary pad	No				Plastic bag	Twice	Dustbin	Twice daily	Only with water		No								Yes	Sometimes	Yes	Yes	Mother	Family	beliefs Taboos	0	1	1	0	0	0	Visiting religious places	0	0	1	0
Below 15 years	JHS 1	Dagomba	Islam	Private	With my mother and father	Basic education	No formal education	Self employed	Self employed		Yes	Commercially made sanitary pad	No				Plastic bag	Three and more	Dustbin	Three times a day	Water and soap		No								No	Sometimes	Yes	Yes	Father	School health	Taboos	0	0	1	0	0	0	Prohibition from touching the holy books (Bible or Qur’an) Visiting religious places	0	1	1	0
15 to 19 years	JHS 3	Gonja	Islam	Private	Relatives	Basic education	Secondary school	Public sector employment	Public sector employment		Yes	Commercially made sanitary pad	No				Papers	Twice	Drain	Twice daily	Water and soap		Yes	2	Pains	1	0	0	0	0	No	Always	Yes	Yes	Friends	Workshop	My culture does not talk about menses Taboos	1	0	1	0	0	0	Prohibition on attending religious ceremonies Prohibition from touching the holy books (Bible or Qur’an) Visiting religious places	1	1	1	0
Below 15 years	JHS 3	Dagomba	Islam	Private	With my mother and father	No formal education	Secondary school	Public sector employment	Unemployed		Yes	Cloth	Yes	In the bath room	Soap and water	Sunlights	Other	Three and more	Open field	Twice daily	Water and soap		Yes	2	Pains	1	0	0	0	0	No	Sometimes	Yes	Yes	Mother	School health	Taboos Prohibition from cooking in the home No sex with husband	0	0	1	1	1	0	Prohibition on attending religious ceremonies Prohibition from touching the holy books (Bible or Qur’an) Visiting religious places	1	1	1	0
15 to 19 years	JHS 3	Mamprusi	Islam	Private	With my mother and father	No formal education	No formal education	Self employed	Self employed		Yes	Commercially made sanitary pad	No				Not wrap	Three and more	Toilet	Three times a day	Only with water		No								No	Always	No	No	Self	Workshop	My culture does not talk about menses Taboos	1	0	1	0	0	0	Prohibition from touching the holy books (Bible or Qur’an) Visiting religious places Others	0	1	1	1
15 to 19 years	JHS 2	Dagomba	Islam	Private	With my mother and father	Secondary school	Secondary school	Public sector employment	Public sector employment		Yes	Commercially made sanitary pad	No				Plastic bag	Twice	Others	Twice daily	Water and soap		No								Yes	Sometimes	Yes	Yes	Mother	Family	beliefs Taboos	0	1	1	0	0	0	Prohibition from touching the holy books (Bible or Qur’an) Visiting religious places Others	0	1	1	1
15 to 19 years	JHS 3	Dagomba	Christianity	Public	With my mother and father	College diploma & above	No formal education	Self employed	Public sector employment		Yes	Commercially made sanitary pad	No				Plastic bag	Twice	Dustbin	Twice daily	Only with water		No								No	Sometimes	Yes	Yes	Mother	Family	My culture does not talk about menses	1	0	0	0	0	0	Prohibition from touching the holy books (Bible or Qur’an)	0	1	0	0
15 to 19 years	JHS 3	Dagomba	Islam	Public	Mother only	Basic education	Basic education	Self employed	Self employed		Yes	Cloth	Yes	Separately	Soap and water	Inside the room	Other	Twice	Dustbin	Twice daily	Only with water		No								No	Sometimes	Yes	Yes	Mother	Family	Others	0	0	0	0	0	1	Prohibition from touching the holy books (Bible or Qur’an) Visiting religious places	0	1	1	0
15 to 19 years	JHS 3	Dagomba	Islam	Public	Relatives	No formal education	No formal education	Self employed	Self employed		Yes	Commercially made sanitary pad	Yes	Separately	Soap and water	Others	Plastic bag	Three and more	Dustbin	Twice daily	Water and soap		No								Yes	Sometimes	Yes	Yes	Self	School health	beliefs	0	1	0	0	0	0	Prohibition on attending religious ceremonies	1	0	0	0
15 to 19 years	JHS 3	Dagomba	Islam	Public	With my mother and father	College diploma & above	No formal education	Self employed	Public sector employment		Yes	Commercially made sanitary pad	Yes	Separately	Soap and water	Others	Papers	Twice	Dustbin	Twice daily	Only with water		No								No	Sometimes	Yes	Yes	Mother	School health	My culture does not talk about menses	1	0	0	0	0	0	Prohibition from touching the holy books (Bible or Qur’an)	0	1	0	0
15 to 19 years	JHS 3	Dagomba	Islam	Public	With my mother and father	Basic education	Basic education	Self employed	Self employed		Yes	Commercially made sanitary pad	No				Plastic bag	Three and more	Dustbin	Three times a day	Only with water		No								No	Always	Yes	Yes	Mother	Family	My culture does not talk about menses	1	0	0	0	0	0	Prohibition from touching the holy books (Bible or Qur’an) Visiting religious places	0	1	1	0
Below 15 years	JHS 3	Others	Christianity	Public	With my mother and father	Secondary school	No formal education	Self employed	Self employed		Yes	Commercially made sanitary pad	Yes	Separately	Soap and water	Others	Plastic bag	Three and more	Dustbin	Twice daily	Water and soap		No								No	Sometimes	Yes	Yes	Mother	School health	Others	0	0	0	0	0	1	Others	0	0	0	1
15 to 19 years	JHS 3	Dagomba	Christianity	Public	With my mother and father	Basic education	No formal education	Self employed	Self employed		Yes	Commercially made sanitary pad	Yes	With other cloth	Others	Others	Plastic bag	Three and more	Dustbin	Three times a day	Water and soap		No								Yes	Sometimes	Yes	No	Mother	School health	My culture does not talk about menses	1	0	0	0	0	0	Prohibition from touching the holy books (Bible or Qur’an) Visiting religious places	0	1	1	0
15 to 19 years	JHS 3	Gonja	Islam	Public	Mother only	College diploma & above	College di	Public sector employment	Private sector employment		Yes	Commercially made sanitary pad	No				Plastic bag	Twice	Dustbin	Twice daily	Only with water		No								No	Sometimes	No	Yes	Mother	Family	beliefs No sex with husband Others	0	1	0	0	1	1	Prohibition on attending religious ceremonies Prohibition from touching the holy books (Bible or Qur’an)	1	1	0	0
15 to 19 years	JHS 3	Gonja	Islam	Public	Relatives	Secondary school	Basic education	Self employed	Private sector employment		Yes	Commercially made sanitary pad	No				Plastic bag	Twice	Dustbin	Twice daily	Water and soap		No								Yes	Sometimes	Yes	Yes	Self	School health	beliefs	0	1	0	0	0	0	Prohibition on attending religious ceremonies	1	0	0	0
15 to 19 years	JHS 3	Dagomba	Islam	Public	With my mother and father	Secondary school	Basic education	Self employed	Self employed		Yes	Commercially made sanitary pad	Yes	With other cloth	Others	Others	Plastic bag	Three and more	Dustbin	Twice daily	Only with water		No								No	Sometimes	Yes	Yes	Father	Family	My culture does not talk about menses Others	1	0	0	0	0	1	Prohibition from touching the holy books (Bible or Qur’an)	0	1	0	0
15 to 19 years	JHS 3	Dagomba	Islam	Public	Relatives	Secondary school	No formal education	Self employed	Self employed		Yes	Commercially made sanitary pad	No				Plastic bag	Three and more	Dustbin	Twice daily	Only with water		No								No	Always	Yes	Yes	Self	School health	beliefs	0	1	0	0	0	0	Prohibition on attending religious ceremonies Prohibition from touching the holy books (Bible or Qur’an) Visiting religious places	1	1	1	0
15 to 19 years	JHS 3	Dagomba	Islam	Public	With my mother and father	No formal education	Secondary school	Self employed	Self employed		Yes	Commercially made sanitary pad	Yes	Separately	Soap and water	Others	Plastic bag	Three and more	Dustbin	Twice daily	Water and soap		No								No	Sometimes	Yes	Yes	Self	School health	beliefs	0	1	0	0	0	0	Prohibition from touching the holy books (Bible or Qur’an) Visiting religious places	0	1	1	0
15 to 19 years	JHS 3	Dagomba	Islam	Public	Relatives	Basic education	Secondary school	Self employed	Self employed		Yes	Commercially made sanitary pad	No				Plastic bag	Three and more	Dustbin	Three times a day	Water and soap		No								No	Sometimes	Yes	Yes	Mother	Family	My culture does not talk about menses Prohibition from cooking in the home	1	0	0	1	0	0	Prohibition on attending religious ceremonies Prohibition from touching the holy books (Bible or Qur’an)	1	1	0	0
15 to 19 years	JHS 3	Others	Islam	Public	With my mother and father	No formal education	Basic education	Self employed	Self employed		Yes	Commercially made sanitary pad	Yes	Separately	Soap and water	Others	Plastic bag	Three and more	Dustbin	Three times a day	Only with water		No								Yes	Others	Yes	Yes	Mother	School health	beliefs	0	1	0	0	0	0	Prohibition on attending religious ceremonies Prohibition from touching the holy books (Bible or Qur’an) Visiting religious places	1	1	1	0
15 to 19 years	JHS 3	Dagomba	Islam	Private	Mother only	No formal education	No formal education	Self employed	Self employed		Yes	Commercially made sanitary pad	No				Plastic bag	Three and more	Dustbin	Twice daily	Only with water		No								No	Always	Yes	Yes	Mother	Family	beliefs No sex with husband	0	1	0	0	1	0	Prohibition on attending religious ceremonies Others	1	0	0	1
15 to 19 years	JHS 2	Dagomba	Islam	Private	With my mother and father	College diploma & above	Basic education	Self employed	Private sector employment		Yes	Commercially made sanitary pad	No				Plastic bag	Three and more	Toilet	Twice daily	Water and soap		No								No	Always	Yes	Yes	Mother	Family	beliefs No sex with husband	0	1	0	0	1	0	Prohibition from touching the holy books (Bible or Qur’an) Visiting religious places	0	1	1	0
15 to 19 years	JHS 2	Dagomba	Islam	Public	With my mother and father	Basic education	No formal education	Self employed	Unemployed		Yes	Commercially made sanitary pad	Yes	Separately	Soap and water	Others	Plastic bag	Twice	Dustbin	Twice daily	Water and soap		No								No	Others	Yes	Yes	Self	Family	beliefs	0	1	0	0	0	0	Prohibition on attending religious ceremonies Prohibition from touching the holy books (Bible or Qur’an) Visiting religious places Others	1	1	1	1
Below 15 years	JHS 2	Dagomba	Islam	Public	With my mother and father	College diploma & above	College di	Public sector employment	Private sector employment		Yes	Commercially made sanitary pad	No				Plastic bag	Three and more	Dustbin	Twice daily	Water and soap		No								No	Sometimes	Yes	Yes	Father	Family	No sex with husband	0	0	0	0	1	0	Prohibition from touching the holy books (Bible or Qur’an) Visiting religious places	0	1	1	0
15 to 19 years	JHS 2	Dagomba	Islam	Public	With my mother and father	No formal education	No formal education	Self employed	Self employed		Yes	Commercially made sanitary pad	No				Plastic bag	Three and more	Dustbin	Twice daily	Water and soap		No								Yes	Sometimes	Yes	Yes	Self	School health	beliefs	0	1	0	0	0	0	Prohibition on attending religious ceremonies Prohibition from touching the holy books (Bible or Qur’an) Visiting religious places	1	1	1	0
15 to 19 years	JHS 2	Dagomba	Islam	Public	Mother only	Basic education	Basic education	Self employed	Self employed		Yes	Cloth	No				Plastic bag	Three and more	Dustbin	Three times a day	Water and soap		No								No	Always	Yes	Yes	Self	Others	beliefs No sex with husband	0	1	0	0	1	0	Prohibition from touching the holy books (Bible or Qur’an) Visiting religious places	0	1	1	0
Below 15 years	JHS 1	Dagomba	Islam	Public	With my mother and father	No formal education	No formal education	Unemployed	Self employed		Yes	Commercially made sanitary pad	Yes	In the bath room	Soap and water	Inside the room	Papers	Three and more	Dustbin	Twice daily	Only with water		No								Yes	Sometimes	Yes	Yes	Mother	School health	beliefs	0	1	0	0	0	0	Prohibition on attending religious ceremonies Prohibition from touching the holy books (Bible or Qur’an) Others	1	1	0	1
15 to 19 years	JHS 1	Dagomba	Islam	Public	Mother only	No formal education	No formal education	Unemployed	Self employed		Yes	Commercially made sanitary pad	No				Plastic bag	Three and more	Dustbin	Twice daily	Water and soap		No								Yes	Sometimes	Yes	Yes	Self	School health	beliefs Others	0	1	0	0	0	1	Prohibition on attending religious ceremonies Prohibition from touching the holy books (Bible or Qur’an) Others	1	1	0	1
15 to 19 years	JHS 1	Dagomba	Islam	Public	With my mother and father	No formal education	No formal education	Self employed	Self employed		Yes	Commercially made sanitary pad	No				Plastic bag	Three and more	Dustbin	Three times a day	Only with water		No								Yes	Sometimes	Yes	No	Mother	Family	My culture does not talk about menses	1	0	0	0	0	0	Prohibition from touching the holy books (Bible or Qur’an)	0	1	0	0
15 to 19 years	JHS 3	Dagomba	Islam	Public	With my mother and father	No formal education	No formal education	Self employed	Self employed		Yes	Commercially made sanitary pad	No				Plastic bag	Twice	Dustbin	Twice daily	Water and soap		No								Yes	Others	Yes	Yes	Mother	School health	My culture does not talk about menses beliefs	1	1	0	0	0	0		0	0	0	0
15 to 19 years	JHS 3	Dagomba	Islam	Public	With my mother and father	No formal education	No formal education	Self employed	Self employed		Yes	Commercially made sanitary pad	No				Plastic bag	Twice	Dustbin	Twice daily	Water and soap		No								No	Others	Yes	Yes	Self	School health	My culture does not talk about menses	1	0	0	0	0	0		0	0	0	0
Below 15 years	JHS 3	Others	Christianity	Public	With my mother and father	Basic education	No formal education	Self employed	Private sector employment		No										Water and soap		No								No	Sometimes	Yes	Yes	NGO	School health	My culture does not talk about menses	1	0	0	0	0	0		0	0	0	0
15 to 19 years	JHS 3	Gonja	Islam	Public	With my mother and father	No formal education	No formal education	Self employed	Self employed		Yes	Commercially made sanitary pad	No				Plastic bag	Three and more	Dustbin	Twice daily	Water and soap		No								No	Always	Yes	Yes	Mother	School health	No sex with husband	0	0	0	0	1	0		0	0	0	0
15 to 19 years	JHS 3	Dagomba	Islam	Public	Mother only	No formal education	No formal education	Self employed	Private sector employment		Yes	Commercially made sanitary pad	No				Other	Twice	Open field	Twice daily	Water and soap		No								No	Others	No	No	Mother	School health	Prohibition from cooking in the home	0	0	0	1	0	0		0	0	0	0
15 to 19 years	JHS 3	Dagomba	Islam	Public	With my mother and father	Secondary school	Basic education	Self employed	Public sector employment		Yes	Cloth	No				Plastic bag	Twice	Dustbin	Twice daily	Water and soap		No								No	Others	Yes	Yes	Self	School health	No sex with husband	0	0	0	0	1	0		0	0	0	0
15 to 19 years	JHS 3	Dagomba	Islam	Public	With my mother and father	No formal education	No formal education	Self employed	Self employed		Yes	Commercially made sanitary pad	No				Plastic bag	Three and more	Drain	Three times a day	Water and soap		No								No	Sometimes	Yes	Yes	Mother	School health	My culture does not talk about menses Prohibition from cooking in the home No sex with husband	1	0	0	1	1	0		0	0	0	0
15 to 19 years	JHS 3	Dagomba	Islam	Public	Mother only	No formal education	No formal education	Self employed	Unemployed		Yes	Commercially made sanitary pad	No				Plastic bag	Three and more	Drain	Twice daily	Only with water		No								No	Sometimes	Yes	No	Mother	Family	No sex with husband	0	0	0	0	1	0		0	0	0	0
15 to 19 years	JHS 3	Gonja	Islam	Private	Mother only	College diploma & above	Secondary school	Self employed	Public sector employment		Yes	Cloth	No				Plastic bag	Twice	Dustbin	Twice daily	Water and soap		No								No	Sometimes	Yes	Yes	Self	School health	Prohibition from cooking in the home No sex with husband	0	0	0	1	1	0		0	0	0	0
Below 15 years	JHS 1	Dagomba	Islam	Public	With my mother and father	No formal education	No formal education	Self employed	Self employed		Yes	Commercially made sanitary pad	No				Plastic bag	Twice	Others	Twice daily	Only with water		No								No	Sometimes	No	Yes	Mother	School health	Prohibition from cooking in the home No sex with husband	0	0	0	1	1	0		0	0	0	0
15 to 19 years	JHS 2	Dagomba	Islam	Public	Mother only	No formal education	No formal education	Self employed	Self employed		Yes	Commercially made sanitary pad	Yes	Separately	Soap and water	Sunlights	Plastic bag	Twice	Drain	Twice daily	Water and soap		No								No	Sometimes	Yes	Yes	Mother	School health	Prohibition from cooking in the home No sex with husband	0	0	0	1	1	0		0	0	0	0
15 to 19 years	JHS 1	Dagomba	Islam	Public	With my mother and father	No formal education	No formal education	Self employed	Self employed		Yes	Commercially made sanitary pad	No				Plastic bag	Once	Open field	Twice daily	Water and soap		No								Yes	Always	Yes	Yes	Mother	School health	My culture does not talk about menses Others	1	0	0	0	0	1		0	0	0	0
Below 15 years	JHS 2	Dagomba	Islam	Public	With my mother and father	College diploma & above	Secondary school	Public sector employment	Private sector employment		Yes	Commercially made sanitary pad	No				Plastic bag	Twice	Dustbin	Twice daily	Only with water		No								No	Sometimes	Yes	Yes	Father	School health	beliefs	0	1	0	0	0	0	Prohibition on attending religious ceremonies Prohibition from touching the holy books (Bible or Qur’an) Others	1	1	0	1
15 to 19 years	JHS 1	Dagomba	Islam	Public	With my mother and father	Secondary school	Basic education	Unemployed	Unemployed		No										Water and soap		No								No	Sometimes	Yes	Yes	Mother	School health	My culture does not talk about menses beliefs	1	1	0	0	0	0	Visiting religious places	0	0	1	0
15 to 19 years	JHS 2	Dagomba	Islam	Public	Relatives	No formal education	No formal education	Self employed	Self employed		Yes	Commercially made sanitary pad	No				Plastic bag	Twice	Dustbin	Three times a day	Water and soap		No								Yes	Always	Yes	Yes	Mother	School health	beliefs	0	1	0	0	0	0	Prohibition on attending religious ceremonies Prohibition from touching the holy books (Bible or Qur’an) Others	1	1	0	1
15 to 19 years	JHS 2	Dagomba	Islam	Public	With my mother and father	No formal education	No formal education	Self employed	Self employed		Yes	Cloth	Yes	In the bath room	Soap and water	Sunlights	Other	Once	Others	Three times a day	Water and soap		No								Yes	Sometimes	Yes	Yes	Mother	Family	My culture does not talk about menses Others	1	0	0	0	0	1	Prohibition from touching the holy books (Bible or Qur’an) Visiting religious places	0	1	1	0
Below 15 years	JHS 1	Dagomba	Islam	Private	With my mother and father	No formal education	No formal education	Self employed	Self employed		Yes	Commercially made sanitary pad	Yes	Separately	Soap and water	Others	Plastic bag	Three and more	Dustbin	Three times a day	Water and soap		No								Yes	Sometimes	Yes	Yes	Mother	Family	beliefs	0	1	0	0	0	0	Prohibition on attending religious ceremonies Prohibition from touching the holy books (Bible or Qur’an) Others	1	1	0	1
Below 15 years	JHS 2	Gonja	Islam	Public	Mother only	No formal education	No formal education	Self employed	Self employed		Yes	Commercially made sanitary pad	No				Plastic bag	Twice	Toilet	Twice daily	Water and soap		No								No	Sometimes	Yes	Yes	Self	Family	beliefs	0	1	0	0	0	0	Prohibition on attending religious ceremonies Prohibition from touching the holy books (Bible or Qur’an) Visiting religious places Others	1	1	1	1
15 to 19 years	JHS 1	Others	Islam	Public	With my mother and father	Basic education	Basic education	Self employed	Self employed		Yes	Commercially made sanitary pad	No				Plastic bag	Three and more	Dustbin	Three times a day	Water and soap		No								No	Sometimes	Yes	Yes	Mother	Family	My culture does not talk about menses	1	0	0	0	0	0	Prohibition from touching the holy books (Bible or Qur’an)	0	1	0	0
15 to 19 years	JHS 2	Dagomba	Islam	Public	Mother only	No formal education	No formal education	Self employed	Self employed		Yes	Commercially made sanitary pad	No				Plastic bag	Once	Open field	Twice daily	Water and soap		No								Yes	Sometimes	No	No	Mother	School health	My culture does not talk about menses	1	0	0	0	0	0	Prohibition from touching the holy books (Bible or Qur’an) Visiting religious places	0	1	1	0
Below 15 years	JHS 2	Gonja	Islam	Public	With my mother and father	Basic education	No formal education	Self employed	Self employed		Yes	Commercially made sanitary pad	No				Plastic bag	Three and more	Dustbin	Twice daily	Water and soap		No								No	Others	Yes	Yes	Mother	School health	beliefs	0	1	0	0	0	0	Prohibition on attending religious ceremonies Prohibition from touching the holy books (Bible or Qur’an) Others	1	1	0	1
Below 15 years	JHS 2	Mamprusi	Islam	Public	Mother only	Basic education	Secondary school	Self employed	Self employed		Yes	Cloth	No				Papers	Twice	Toilet	Twice daily	Only with water		No								No	Sometimes	Yes	Yes	Self	School health	beliefs	0	1	0	0	0	0	Prohibition on attending religious ceremonies Prohibition from touching the holy books (Bible or Qur’an) Visiting religious places Others	1	1	1	1
15 to 19 years	JHS 1	Dagomba	Islam	Public	Relatives	No formal education	No formal education	Self employed	Self employed		Yes	Commercially made sanitary pad	No				Plastic bag	Twice	Open field	Twice daily	Water and soap		No								No	Others	Yes	Yes	Mother	School health	My culture does not talk about menses No sex with husband	1	0	0	0	1	0	Prohibition on attending religious ceremonies Prohibition from touching the holy books (Bible or Qur’an) Visiting religious places	1	1	1	0
Below 15 years	JHS 2	Dagomba	Islam	Public	With my mother and father	No formal education	No formal education	Self employed	Self employed		Yes	Commercially made sanitary pad	Yes	Separately	Soap and water	Others	Papers	Twice	Toilet	Twice daily	Water and soap		No								Yes	Sometimes	Yes	Yes	Mother	School health	beliefs	0	1	0	0	0	0	Prohibition on attending religious ceremonies Prohibition from touching the holy books (Bible or Qur’an) Visiting religious places Others	1	1	1	1
Below 15 years	JHS 2	Dagomba	Islam	Public	With my mother and father	No formal education	No formal education	Self employed	Self employed		Yes	Tissue paper	Yes	Separately	Only water	Others	Papers	Twice	Drain	Twice daily	Water and soap		No								Yes	Others	Yes	Yes	Self	School health	beliefs	0	1	0	0	0	0	Prohibition on attending religious ceremonies Prohibition from touching the holy books (Bible or Qur’an)	1	1	0	0
Below 15 years	JHS 2	Dagomba	Islam	Public	Relatives	No formal education	Basic education	Self employed	Self employed		Yes	Commercially made sanitary pad	Yes	With other cloth	Others	Others	Plastic bag	Twice	Toilet	Twice daily	Only with water		No								Yes	Sometimes	No	Yes	Mother	Family	beliefs	0	1	0	0	0	0	Prohibition from touching the holy books (Bible or Qur’an) Visiting religious places	0	1	1	0
15 to 19 years	JHS 2	Dagomba	Islam	Public	With my mother and father	Basic education	Basic education	Self employed	Self employed		Yes	Cloth	Yes	In the bath room	Soap and water	Sunlights	Other	Three and more	Others	Three times a day	Water and soap		No								Yes	Sometimes	Yes	Yes	Mother	School health	Others	0	0	0	0	0	1	Prohibition from touching the holy books (Bible or Qur’an) Visiting religious places	0	1	1	0
15 to 19 years	JHS 2	Dagomba	Islam	Public	With my mother and father	Basic education	No formal education	Self employed	Public sector employment		Yes	Cloth	Yes	In the bath room	Soap and water	Sunlights	Other	Twice	Dustbin	Twice daily	Water and soap		No								Yes	Sometimes	Yes	Yes	Mother	Family	beliefs	0	1	0	0	0	0	Prohibition from touching the holy books (Bible or Qur’an) Visiting religious places	0	1	1	0
15 to 19 years	JHS 2	Dagomba	Islam	Public	Relatives	Secondary school	No formal education	Self employed	Self employed		No										Water and soap		No								Yes	Sometimes	Yes	Yes	Mother	Family	beliefs	0	1	0	0	0	0	Prohibition on attending religious ceremonies Prohibition from touching the holy books (Bible or Qur’an) Visiting religious places Others	1	1	1	1
15 to 19 years	JHS 2	Dagomba	Islam	Public	With my mother and father	No formal education	Basic education	Self employed	Self employed		Yes	Commercially made sanitary pad	No				Plastic bag	Three and more	Dustbin	Twice daily	Water and soap		No								No	Sometimes	No	Yes	Mother	Family	My culture does not talk about menses Prohibition from cooking in the home No sex with husband	1	0	0	1	1	0	Prohibition from touching the holy books (Bible or Qur’an) Visiting religious places	0	1	1	0
Below 15 years	JHS 2	Others	Christianity	Public	Mother only	College diploma & above	College di	Public sector employment	Public sector employment		Yes	Commercially made sanitary pad	No				Plastic bag	Three and more	Dustbin	Twice daily	Water and soap		No								Yes	Others	Yes	Yes	Self	School health	Others	0	0	0	0	0	1	Others	0	0	0	1
15 to 19 years	JHS 2	Others	Christianity	Public	With my mother and father	No formal education	No formal education	Self employed	Public sector employment		Yes	Commercially made sanitary pad	No				Plastic bag	Twice	Open field	Twice daily	Water and soap		No								No	Sometimes	Yes	Yes	Father	School health	My culture does not talk about menses Prohibition from cooking in the home No sex with husband	1	0	0	1	1	0	Prohibition on attending religious ceremonies Prohibition from touching the holy books (Bible or Qur’an) Visiting religious places	1	1	1	0
15 to 19 years	JHS 2	Dagomba	Islam	Public	With my mother and father	Secondary school	No formal education	Self employed	Unemployed		Yes	Commercially made sanitary pad	Yes	With other cloth	Others	Others	Plastic bag	Three and more	Dustbin	Three times a day	Water and soap		No								No	Sometimes	No	Yes	Mother	Family	My culture does not talk about menses beliefs No sex with husband	1	1	0	0	1	0	Prohibition from touching the holy books (Bible or Qur’an) Visiting religious places	0	1	1	0
Below 15 years	JHS 2	Others	Christianity	Public	Relatives	No formal education	No formal education	Self employed	Self employed		Yes	Commercially made sanitary pad	No				Plastic bag	Twice	Dustbin	Twice daily	Water and soap		No								No	Always	Yes	No	Mother	Family	My culture does not talk about menses	1	0	0	0	0	0	Others	0	0	0	1
Below 15 years	JHS 2	Dagomba	Islam	Public	With my mother and father	No formal education	No formal education	Self employed	Self employed		Yes	Commercially made sanitary pad	No				Plastic bag	Twice	Dustbin	Twice daily	Water and soap		No								No	Sometimes	Yes	Yes	Mother	School health	beliefs	0	1	0	0	0	0	Prohibition on attending religious ceremonies Prohibition from touching the holy books (Bible or Qur’an) Visiting religious places Others	1	1	1	1
Below 15 years	JHS 2	Dagomba	Islam	Public	With my mother and father	Basic education	No formal education	Self employed	Self employed		Yes	Commercially made sanitary pad	Yes	With other cloth	Others	Others	Plastic bag	Twice	Dustbin	Twice daily	Only with water		No								Yes	Sometimes	Yes	Yes	Mother	School health	No sex with husband	0	0	0	0	1	0	Prohibition from touching the holy books (Bible or Qur’an)	0	1	0	0
Below 15 years	JHS 2	Dagomba	Islam	Public	With my mother and father	Basic education	Basic education	Self employed	Self employed		No										Water and soap		No								No	Sometimes	No	Yes	Mother	Family	beliefs	0	1	0	0	0	0	Prohibition on attending religious ceremonies Prohibition from touching the holy books (Bible or Qur’an) Visiting religious places Others	1	1	1	1
Below 15 years	JHS 2	Dagomba	Islam	Public	With my mother and father	Basic education	No formal education	Self employed	Private sector employment		Yes	Commercially made sanitary pad	Yes	In the bath room	Soap and water	Sunlights	Papers	Twice	Dustbin	Twice daily	Water and soap		No								Yes	Sometimes	Yes	No	Self	School health	My culture does not talk about menses beliefs	1	1	0	0	0	0	Prohibition on attending religious ceremonies	1	0	0	0
15 to 19 years	JHS 2	Mamprusi	Islam	Public	With my mother and father	No formal education	No formal education	Unemployed	Self employed		Yes	Commercially made sanitary pad	No				Other	Twice	Toilet	Twice daily	Water and soap		No								Yes	Sometimes	Yes	Yes	Self	School health	beliefs	0	1	0	0	0	0	Prohibition on attending religious ceremonies Prohibition from touching the holy books (Bible or Qur’an) Others	1	1	0	1
Below 15 years	JHS 2	Gonja	Islam	Public	With my mother and father	College diploma & above	Secondary school	Self employed	Public sector employment		Yes	Commercially made sanitary pad	No				Papers	Three and more	Dustbin	Twice daily	Water and soap		No								No	Sometimes	Yes	Yes	Self	School health	beliefs	0	1	0	0	0	0	Prohibition on attending religious ceremonies Prohibition from touching the holy books (Bible or Qur’an) Visiting religious places Others	1	1	1	1
Below 15 years	JHS 2	Gonja	Islam	Public	With my mother and father	Basic education	No formal education	Self employed	Self employed		Yes	Commercially made sanitary pad	Yes	Separately	Soap and water	Sunlights	Plastic bag	Three and more	Dustbin	Twice daily	Water and soap		No								Yes	Sometimes	Yes	Yes	Self	Family	beliefs Prohibition from cooking in the home	0	1	0	1	0	0	Prohibition on attending religious ceremonies Prohibition from touching the holy books (Bible or Qur’an)	1	1	0	0
Below 15 years	JHS 2	Mamprusi	Islam	Public	Relatives	No formal education	No formal education	Unemployed	Self employed		Yes	Commercially made sanitary pad	No				Plastic bag	Three and more	Toilet	Twice daily	Water and soap		No								Yes	Sometimes	Yes	Yes	Self	School health	beliefs	0	1	0	0	0	0	Prohibition on attending religious ceremonies Prohibition from touching the holy books (Bible or Qur’an)	1	1	0	0
Below 15 years	JHS 2	Gonja	Christianity	Public	With my mother and father	College diploma & above	Secondary school	Public sector employment	Public sector employment		Yes	Commercially made sanitary pad	No				Plastic bag	Twice	Dustbin	Twice daily	Water and soap		No								Yes	Sometimes	Yes	Yes	Mother	Family	Prohibition from cooking in the home No sex with husband	0	0	0	1	1	0	Prohibition from touching the holy books (Bible or Qur’an) Visiting religious places	0	1	1	0
15 to 19 years	JHS 2	Mamprusi	Islam	Public	Mother only	Basic education	Secondary school	Self employed	Self employed		Yes	Commercially made sanitary pad	No				Plastic bag	Twice	Dustbin	Twice daily	Water and soap		No								No	Sometimes	Yes	Yes	Mother	Family	Prohibition from cooking in the home	0	0	0	1	0	0	Prohibition from touching the holy books (Bible or Qur’an) Visiting religious places	0	1	1	0
Below 15 years	JHS 2	Dagomba	Islam	Public	Father only	No formal education	No formal education	Self employed	Unemployed		Yes	Cloth	Yes	With other cloth	Soap and water	Sunlights	Not wrap	Twice	Others	Daily	Water and soap		No								Yes	Sometimes	Yes	Yes	Father	School health	My culture does not talk about menses No sex with husband	1	0	0	0	1	0	Prohibition on attending religious ceremonies Prohibition from touching the holy books (Bible or Qur’an) Visiting religious places	1	1	1	0
Below 15 years	JHS 2	Gonja	Islam	Public	With my mother and father	Basic education	No formal education	Self employed	Public sector employment		Yes	Commercially made sanitary pad	No				Papers	Twice	Dustbin	Twice daily	Only with water		No								No	Sometimes	Yes	Yes	Mother	School health	beliefs	0	1	0	0	0	0	Prohibition on attending religious ceremonies Prohibition from touching the holy books (Bible or Qur’an)	1	1	0	0
Below 15 years	JHS 2	Others	Christianity	Public	With my mother and father	Basic education	No formal education	Self employed	Self employed		Yes	Commercially made sanitary pad	Yes	With other cloth	Soap and water	Sunlights	Plastic bag	Three and more	Toilet	Twice daily	Water and soap		No								No	Sometimes	Yes	Yes	Self	School health	Others	0	0	0	0	0	1	Others	0	0	0	1
Below 15 years	JHS 2	Dagomba	Islam	Public	With my mother and father	No formal education	No formal education	Self employed	Unemployed		Yes	Cloth	Yes	In the bath room	Soap and water	Sunlights	Other	Three and more	Others	Twice daily	Water and soap		No								Yes	Sometimes	Yes	Yes	Friends	School health	My culture does not talk about menses beliefs	1	1	0	0	0	0	Prohibition on attending religious ceremonies Prohibition from touching the holy books (Bible or Qur’an) Visiting religious places	1	1	1	0
Below 15 years	JHS 1	Dagomba	Islam	Public	With my mother and father	Basic education	Basic education	Self employed	Self employed		Yes	Commercially made sanitary pad	No				Plastic bag	Twice	Dustbin	Twice daily	Only with water		Yes	3	Others	0	1	0	0	1	Yes	Sometimes	Yes	Yes	Mother	School health	Prohibition from cooking in the home No sex with husband	0	0	0	1	1	0	Prohibition from touching the holy books (Bible or Qur’an) Visiting religious places	0	1	1	0
Below 15 years	JHS 2	Dagomba	Islam	Public	Mother only	Secondary school	Basic education	Self employed	Public sector employment		Yes	Commercially made sanitary pad	No				Plastic bag	Twice	Dustbin	Twice daily	Water and soap		Yes	2	Others	1	1	1	0	1	No	Sometimes	Yes	Yes	Mother	Family	Prohibition from cooking in the home No sex with husband	0	0	0	1	1	0	Prohibition from touching the holy books (Bible or Qur’an) Visiting religious places	0	1	1	0
Below 15 years	JHS 1	Dagomba	Islam	Public	With my mother and father	Basic education	Basic education	Self employed	Self employed		Yes	Commercially made sanitary pad	No				Plastic bag	Twice	Dustbin	Twice daily	Only with water		Yes	1	Others	0	1	0	1	1	No	Sometimes	Yes	Yes	Mother	Family	Prohibition from cooking in the home No sex with husband	0	0	0	1	1	0	Prohibition from touching the holy books (Bible or Qur’an) Visiting religious places Others	0	1	1	1
Below 15 years	JHS 2	Others	Islam	Public	With my mother and father	Basic education	Basic education	Public sector employment	Unemployed		Yes	Cloth	Yes	In the bath room	Only water	Sunlights	Other	Once	Others	Twice daily	Water and soap		Yes	4	Others	0	0	0	0	1	No	Sometimes	No	Yes	NGO	Others	No sex with husband Others	0	0	0	0	1	1	Prohibition from touching the holy books (Bible or Qur’an) Visiting religious places	0	1	1	0
15 to 19 years	JHS 1	Gonja	Christianity	Public	With my mother and father	No formal education	No formal education	Self employed	Self employed		Yes	Commercially made sanitary pad	No				Plastic bag	Twice	Dustbin	Twice daily	Water and soap		Yes	4	Others	1	11	0	0	1	No	Others	Yes	Yes	Mother	Family	My culture does not talk about menses No sex with husband	1	0	0	0	1	0	Prohibition on attending religious ceremonies Prohibition from touching the holy books (Bible or Qur’an) Visiting religious places	1	1	1	0
Below 15 years	JHS 1	Dagomba	Islam	Public	With my mother and father	Secondary school	Basic education	Self employed	Public sector employment		Yes	Cloth	Yes	In the bath room	Soap and water	Sunlights	Other	Twice	Others	Twice daily	Water and soap		Yes	3	Staining dress	1	1	0	0	0	Yes	Sometimes	Yes	Yes	Mother	School health	beliefs	0	1	0	0	0	0	Prohibition from touching the holy books (Bible or Qur’an) Visiting religious places	0	1	1	0
Below 15 years	JHS 3	Mamprusi	Christianity	Public	Mother only	Secondary school	No formal education	Self employed	Unemployed		Yes	Tissue paper	No				Plastic bag	Three and more	Drain	Twice daily	Water and soap		Yes	1	Staining dress Shyness	1	1	1	0	0	No	Others	Yes	Yes	Self	School health	beliefs Others	0	1	0	0	0	1	Prohibition on attending religious ceremonies Visiting religious places	1	0	1	0
15 to 19 years	JHS 1	Mamprusi	Islam	Public	With my mother and father	No formal education	No formal education	Self employed	Self employed		Yes	Cloth	Yes	In the bath room	Soap and water	Inside the room	Other	Once	Others	Twice daily	Water and soap		Yes	1	Stigma	1	0	0	1	0	No	Sometimes	Yes	Yes	Mother	Family	My culture does not talk about menses	1	0	0	0	0	0	Visiting religious places	0	0	1	0
Below 15 years	JHS 3	Gonja	Islam	Public	Father only	Basic education	College di	Private sector employement	Self employed		No										Water and soap		Yes	3	Others	1	0	0	0	1	No	Always	Yes	Yes	Friends	School health	My culture does not talk about menses	1	0	0	0	0	0	Prohibition from touching the holy books (Bible or Qur’an)	0	1	0	0
Below 15 years	JHS 1	Others	Islam	Public	Relatives	Basic education	No formal education	Private sector employement	Self employed		Yes	Tissue paper	Yes	In the bath room	Others	Others	Plastic bag	Twice	Drain	Daily	Water and soap		Yes	1	Staining dress	0	1	0	0	0	No	Others	Yes	Yes	Friends	School health	Prohibition from cooking in the home	0	0	0	1	0	0	Prohibition on attending religious ceremonies	1	0	0	0
Below 15 years	JHS 3	Mamprusi	Islam	Public	Mother only	No formal education	Secondary school	Self employed	Public sector employment		Yes	Commercially made sanitary pad	No				Plastic bag	Once	Drain	Twice daily	Water and soap		Yes	3	Staining dress	0	1	0	0	0	No	Others	Yes	Yes	Mother	School health	My culture does not talk about menses Others	1	0	0	0	0	1	Prohibition on attending religious ceremonies Visiting religious places	1	0	1	0
15 to 19 years	JHS 2	Dagomba	Islam	Public	With my mother and father	College diploma & above	No formal education	Self employed	Public sector employment		Yes	Commercially made sanitary pad	No				Plastic bag	Three and more	Dustbin	Three times a day	Water and soap		Yes	1	Pains	1	0	0	0	0	Yes	Sometimes	Yes	Yes	Mother	School health	No sex with husband	0	0	0	0	1	0	Prohibition from touching the holy books (Bible or Qur’an) Visiting religious places	0	1	1	0
Below 15 years	JHS 3	Dagomba	Islam	Public	With my mother and father	No formal education	No formal education	Self employed	Self employed		Yes	Commercially made sanitary pad	No				Plastic bag	Three and more	Toilet	Three times a day	Water and soap		No								Yes	Sometimes	Yes	Yes	NGO	School health	Prohibition from cooking in the home Others	0	0	0	1	0	1	Prohibition on attending religious ceremonies Prohibition from touching the holy books (Bible or Qur’an) Visiting religious places	1	1	1	0
Below 15 years	JHS 2	Dagomba	Islam	Public	With my mother and father	Basic education	Basic education	Self employed	Self employed		Yes	Commercially made sanitary pad	No				Plastic bag	Three and more	Dustbin	Twice daily	Water and soap		Yes	2	Others	0	0	0	1	1	No	Sometimes	Yes	Yes	Mother	Family	beliefs	0	1	0	0	0	0	Prohibition from touching the holy books (Bible or Qur’an) Visiting religious places	0	1	1	0
Below 15 years	JHS 3	Dagomba	Islam	Public	With my mother and father	Basic education	Basic education	Self employed	Self employed		No										Water and soap		No								Yes	Sometimes	Yes	Yes	Mother	Others	Others	0	0	0	0	0	1	Prohibition from touching the holy books (Bible or Qur’an) Visiting religious places	0	1	1	0
Below 15 years	JHS 1	Dagomba	Islam	Public	With my mother and father	Secondary school	No formal education	Self employed	Self employed		Yes	Commercially made sanitary pad	No				Plastic bag	Twice	Dustbin	Twice daily	Only with water		Yes	3	Others	0	0	0	0	1	No	Sometimes	Yes	Yes	Friends	School health	My culture does not talk about menses Prohibition from cooking in the home	1	0	0	1	0	0	Prohibition on attending religious ceremonies Visiting religious places	1	0	1	0
Below 15 years	JHS 3	Dagomba	Islam	Public	Father only	No formal education	No formal education	Self employed	Self employed		Yes	Commercially made sanitary pad	No				Other	Three and more	Dustbin	Twice daily	Water and soap		No								No	Always	Yes	Yes	Mother	Family	My culture does not talk about menses	1	0	0	0	0	0	Prohibition from touching the holy books (Bible or Qur’an) Visiting religious places	0	1	1	0
15 to 19 years	JHS 3	Dagomba	Islam	Public	Mother only	Secondary school	No formal education	Self employed	Self employed		Yes	Commercially made sanitary pad	No				Plastic bag	Twice	Dustbin	Twice daily	Water and soap		No								No	Sometimes	Yes	Yes	Mother	School health	Prohibition from cooking in the home	0	0	0	1	0	0	Prohibition on attending religious ceremonies Visiting religious places	1	0	1	0
15 to 19 years	JHS 2	Dagomba	Islam	Public	Father only	Basic education	No formal education	Self employed	Self employed		Yes	Commercially made sanitary pad	No				Plastic bag	Three and more	Dustbin	Twice daily	Water and soap		Yes	1	Stigma Others	0	0	0	1	1	No	Sometimes	Yes	Yes	Father	School health	My culture does not talk about menses	1	0	0	0	0	0	Prohibition from touching the holy books (Bible or Qur’an)	0	1	0	0
Below 15 years	JHS 1	Dagomba	Islam	Public	With my mother and father	Secondary school	No formal education	Self employed	Self employed		Yes	Commercially made sanitary pad	No				Not wrap	Once	Open field	Twice daily	Water and soap		Yes	3	Pains	1	0	0	0	0	Yes	Others	No	No	Self	School health	Prohibition from cooking in the home Others	0	0	0	1	0	1	Prohibition from touching the holy books (Bible or Qur’an) Visiting religious places	0	1	1	0
15 to 19 years	JHS 2	Dagomba	Islam	Public	With my mother and father	Basic education	Basic education	Self employed	Self employed		No										Only with water		Yes	1	Others	0	0	0	0	1	No	Sometimes	Yes	Yes	Mother	School health	My culture does not talk about menses	1	0	0	0	0	0	Prohibition on attending religious ceremonies Visiting religious places	1	0	1	0
Below 15 years	JHS 2	Gonja	Islam	Public	Relatives	Secondary school	Secondary school	Self employed	Public sector employment		Yes	Commercially made sanitary pad	No				Plastic bag	Three and more	Toilet	Twice daily	Water and soap		Yes	2	Others	0	0	0	0	1	No	Sometimes	No	No	Father	School health	No sex with husband	0	0	0	0	1	0	Prohibition from touching the holy books (Bible or Qur’an)	0	1	0	0
Below 15 years	JHS 1	Gonja	Islam	Public	With my mother and father	Secondary school	Secondary school	Self employed	Public sector employment		Yes	Commercially made sanitary pad	No				Plastic bag	Twice	Dustbin	Twice daily	Only with water		Yes	2	Others	0	0	0	0	1	No	Sometimes	Yes	Yes	Mother	Family	beliefs Prohibition from cooking in the home	0	1	0	1	0	0	Prohibition from touching the holy books (Bible or Qur’an) Visiting religious places	0	1	1	0
15 to 19 years	JHS 3	Dagomba	Islam	Public	Mother only	No formal education	Basic education	Self employed	Self employed		Yes	Commercially made sanitary pad	No				Plastic bag	Three and more	Drain	Twice daily	Water and soap		Yes	1	Pains	1	0	0	0	0	Yes	Sometimes	Yes	Yes	Mother	School health	No sex with husband Others	0	0	0	0	1	1	Prohibition from touching the holy books (Bible or Qur’an) Visiting religious places Others	0	1	1	1
15 to 19 years	JHS 3	Dagomba	Islam	Public	With my mother and father	No formal education	No formal education	Self employed	Unemployed		Yes	Commercially made sanitary pad	No				Plastic bag	Twice	Open field	Twice daily	Water and soap		No								No	Always	No	Yes	Self	School health	Prohibition from cooking in the home No sex with husband Others	0	0	0	1	1	1	Prohibition from touching the holy books (Bible or Qur’an) Visiting religious places	0	1	1	0
Below 15 years	JHS 2	Dagomba	Islam	Public	With my mother and father	No formal education	No formal education	Self employed	Self employed		Yes	Commercially made sanitary pad	No				Plastic bag	Twice	Dustbin	Twice daily	Water and soap		Yes	3	Others	0	0	0	0	1	No	Sometimes	Yes	Yes	Mother	School health	Prohibition from cooking in the home No sex with husband Others	0	0	0	1	1	1	Prohibition from touching the holy books (Bible or Qur’an)	0	1	0	0
Below 15 years	JHS 3	Dagomba	Islam	Public	Mother only	Secondary school	No formal education	Self employed	Public sector employment		Yes	Commercially made sanitary pad	No				Plastic bag	Twice	Dustbin	Twice daily	Only with water		Yes	2	Pains	1	1	0	0	0	No	Others	Yes	Yes	Mother	School health	Prohibition from cooking in the home No sex with husband	0	0	0	1	1	0	Prohibition from touching the holy books (Bible or Qur’an) Visiting religious places Others	0	1	1	1
15 to 19 years	JHS 2	Dagomba	Islam	Public	With my mother and father	No formal education	No formal education	Self employed	Self employed		Yes	Commercially made sanitary pad	No				Plastic bag	Three and more	Toilet	Twice daily	Only with water		Yes	4	Others	0	0	0	0	1	Yes	Sometimes	Yes	Yes	Mother	Family	No sex with husband	0	0	0	0	1	0	Visiting religious places	0	0	1	0
Below 15 years	JHS 1	Dagomba	Islam	Public	Relatives	Basic education	Basic education	Self employed	Self employed		Yes	Commercially made sanitary pad	No				Plastic bag	Twice	Drain	Twice daily	Only with water		Yes	2	Pains	1	0	1	0	0	No	Sometimes	No	Yes	Self	School health	My culture does not talk about menses No sex with husband Others	1	0	0	0	1	1	Prohibition from touching the holy books (Bible or Qur’an) Visiting religious places Others	0	1	1	1
Below 15 years	JHS 2	Gonja	Islam	Public	With my mother and father	Secondary school	College di	Public sector employment	Self employed		Yes	Commercially made sanitary pad	Yes	In the bath room	Only water	Sunlights	Plastic bag	Three and more	Dustbin	Twice daily	Only with water		No								Yes	Always	Yes	Yes	Mother	School health	My culture does not talk about menses	1	0	0	0	0	0	Prohibition from touching the holy books (Bible or Qur’an)	0	1	0	0
15 to 19 years	JHS 2	Dagomba	Islam	Public	With my mother and father	No formal education	No formal education	Self employed	Self employed		Yes	Commercially made sanitary pad	No				Papers	Twice	Toilet	Twice daily	Water and soap		No								Yes	Sometimes	No	Yes	Self	School health	beliefs	0	1	0	0	0	0	Prohibition from touching the holy books (Bible or Qur’an)	0	1	0	0
15 to 19 years	JHS 2	Dagomba	Islam	Public	Mother only	No formal education	No formal education	Self employed	Self employed		Yes	Commercially made sanitary pad	No				Plastic bag	Twice	Toilet	Twice daily	Only with water		No								Yes	Always	Yes	Yes	Mother	School health	No sex with husband	0	0	0	0	1	0	Visiting religious places	0	0	1	0
Below 15 years	JHS 2	Dagomba	Islam	Public	With my mother and father	Secondary school	Secondary school	Self employed	Self employed		No										Water and soap		No								No	Always	Yes	Yes	Mother	Family	beliefs	0	1	0	0	0	0	Prohibition from touching the holy books (Bible or Qur’an)	0	1	0	0
Below 15 years	JHS 2	Dagomba	Islam	Public	With my mother and father	Secondary school	Basic education	Self employed	Self employed		Yes	Commercially made sanitary pad	Yes	Separately	Soap and water	Sunlights	Plastic bag	Twice	Toilet	Twice daily	Water and soap		No								No	Always	Yes	Yes	Mother	School health	beliefs	0	1	0	0	0	0	Prohibition from touching the holy books (Bible or Qur’an)	0	1	0	0
15 to 19 years	JHS 2	Dagomba	Islam	Public	With my mother and father	College diploma & above	College di	Public sector employment	Public sector employment		Yes	Commercially made sanitary pad	No				Plastic bag	Twice	Dustbin	More than three times a day	Only with water		No								No	Sometimes	No	Yes	Mother	School health	beliefs	0	1	0	0	0	0	Prohibition from touching the holy books (Bible or Qur’an)	0	1	0	0
15 to 19 years	JHS 2	Dagomba	Islam	Public	With my mother and father	No formal education	No formal education	Self employed	Self employed		Yes	Commercially made sanitary pad	No				Plastic bag	Twice	Dustbin	Twice daily	Water and soap		No								Yes	Others	Yes	Yes	Self	Family	beliefs No sex with husband	0	1	0	0	1	0	Prohibition from touching the holy books (Bible or Qur’an)	0	1	0	0
15 to 19 years	JHS 2	Dagomba	Islam	Public	With my mother and father	No formal education	No formal education	Self employed	Self employed		Yes	Commercially made sanitary pad	No				Plastic bag	Three and more	Dustbin	Three times a day	Water and soap		No								No	Sometimes	Yes	Yes	Mother	Family	beliefs No sex with husband	0	1	0	0	1	0	Prohibition from touching the holy books (Bible or Qur’an)	0	1	0	0
15 to 19 years	JHS 3	Dagomba	Islam	Public	With my mother and father	Secondary school	Basic education	Self employed	Self employed		Yes	Commercially made sanitary pad	No				Plastic bag	Twice	Dustbin	Twice daily	Only with water		No								Yes	Sometimes	Yes	Yes	Mother	School health	Others	0	0	0	0	0	1	Prohibition on attending religious ceremonies Prohibition from touching the holy books (Bible or Qur’an) Visiting religious places	1	1	1	0
Below 15 years	JHS 1	Others	Christianity	Public	With my mother and father	College diploma & above	Basic education	Unemployed	Public sector employment		Yes	Commercially made sanitary pad	No				Plastic bag	Twice	Dustbin	Twice daily	Water and soap		Yes	2	Pains	1	1	0	1	0	No	Sometimes	Yes	Yes	Father	Family	beliefs No sex with husband	0	1	0	0	1	0	Prohibition on attending religious ceremonies Visiting religious places	1	0	1	0
Below 15 years	JHS 2	Dagomba	Islam	Public	With my mother and father	Secondary school	No formal education	Self employed	Self employed		Yes	Commercially made sanitary pad	No				Plastic bag	Twice	Dustbin	Twice daily	Water and soap		Yes	4	Others	0	1	0	0	1	No	Others	Yes	Yes	Father	School health	Others	0	0	0	0	0	1	Others	0	0	0	1
15 to 19 years	JHS 3	Dagomba	Islam	Public	With my mother and father	No formal education	No formal education	Self employed	Self employed		Yes	Commercially made sanitary pad	No				Plastic bag	Twice	Dustbin	Twice daily	Water and soap		No								No	Sometimes	No	No	Self	School health	No sex with husband Others	0	0	0	0	1	1	Prohibition from touching the holy books (Bible or Qur’an) Visiting religious places Others	0	1	1	1
15 to 19 years	JHS 2	Dagomba	Christianity	Public	Relatives	College diploma & above	Secondary school	Private sector employement	Self employed		Yes	Cloth	Yes	Separately	Soap and water	Inside the room	Other	Twice	Others	Twice daily	Only with water		No								Yes	Sometimes	No	Yes	Self	School health	My culture does not talk about menses	1	0	0	0	0	0	Others	0	0	0	1
Below 15 years	JHS 2	Dagomba	Islam	Public	With my mother and father	No formal education	No formal education	Self employed	Self employed		Yes	Commercially made sanitary pad	No				Plastic bag	Twice	Toilet	Three times a day	Water and soap		No								Yes	Sometimes	Yes	Yes	Mother	School health	No sex with husband	0	0	0	0	1	0	Prohibition from touching the holy books (Bible or Qur’an)	0	1	0	0
15 to 19 years	JHS 3	Dagomba	Islam	Public	With my mother and father	No formal education	No formal education	Self employed	Self employed		No										Water and soap		Yes	2	Staining dress	0	1	1	0	0	No	Always	Yes	Yes	Self	School health	My culture does not talk about menses beliefs	1	1	0	0	0	0	Prohibition on attending religious ceremonies Prohibition from touching the holy books (Bible or Qur’an) Visiting religious places	1	1	1	0
15 to 19 years	JHS 2	Dagomba	Islam	Public	With my mother and father	Secondary school	Secondary school	Self employed	Self employed		Yes	Commercially made sanitary pad	No				Plastic bag	Three and more	Toilet	Three times a day	Only with water		Yes	4	Others	0	0	0	0	1	Yes	Sometimes	Yes	Yes	Mother	Family	My culture does not talk about menses Prohibition from cooking in the home	1	0	0	1	0	0	Prohibition from touching the holy books (Bible or Qur’an)	0	1	0	0
Below 15 years	JHS 2	Dagomba	Islam	Public	Mother only	No formal education	Basic education	Self employed	Public sector employment		Yes	Commercially made sanitary pad	No				Plastic bag	Twice	Toilet	Twice daily	Water and soap		No								No	Always	Yes	No	Mother	School health	beliefs No sex with husband	0	1	0	0	1	0	Prohibition from touching the holy books (Bible or Qur’an)	0	1	0	0
15 to 19 years	JHS 3	Dagomba	Islam	Public	Father only	Secondary school	No formal education	Self employed	Self employed		Yes	Commercially made sanitary pad	No				Plastic bag	Three and more	Dustbin	Three times a day	Water and soap		No								No	Sometimes	Yes	Yes	Father	School health	Prohibition from cooking in the home Others	0	0	0	1	0	1	Prohibition from touching the holy books (Bible or Qur’an) Visiting religious places	0	1	1	0
15 to 19 years	JHS 1	Gonja	Islam	Public	Mother only	Secondary school	No formal education	Self employed	Self employed		Yes	Commercially made sanitary pad	No				Plastic bag	Twice	Dustbin	Three times a day	Only with water		Yes	1	Pains	1	1	0	0	0	Yes	Sometimes	Yes	Yes	Mother	Family	Others	0	0	0	0	0	1	Prohibition from touching the holy books (Bible or Qur’an) Visiting religious places Others	0	1	1	1
Below 15 years	JHS 1	Dagomba	Islam	Public	Relatives	College diploma & above	College di	Public sector employment	Public sector employment		Yes	Commercially made sanitary pad	No				Plastic bag	Three and more	Toilet	Three times a day	Water and soap		Yes	2	Pains	1	0	0	0	0	No	Sometimes	Yes	Yes	Mother	School health	My culture does not talk about menses Prohibition from cooking in the home	1	0	0	1	0	0	Prohibition from touching the holy books (Bible or Qur’an)	0	1	0	0
Below 15 years	JHS 2	Gonja	Islam	Public	With my mother and father	College diploma & above	College di	Public sector employment	Public sector employment		Yes	Commercially made sanitary pad	No				Plastic bag	Three and more	Toilet	Three times a day	Water and soap		No								No	Sometimes	Yes	Yes	Mother	Family	My culture does not talk about menses beliefs Prohibition from cooking in the home	1	1	0	1	0	0	Prohibition from touching the holy books (Bible or Qur’an)	0	1	0	0
15 to 19 years	JHS 3	Dagomba	Islam	Public	With my mother and father	Secondary school	No formal education	Self employed	Self employed		Yes	Cloth	Yes	With other cloth	Soap and water	Inside the room	Other	Three and more	Others	Three times a day	Tissue paper		No								Yes	Sometimes	No	No	Self	School health	Prohibition from cooking in the home No sex with husband	0	0	0	1	1	0	Prohibition on attending religious ceremonies Prohibition from touching the holy books (Bible or Qur’an) Visiting religious places	1	1	1	0
Below 15 years	JHS 2	Dagomba	Islam	Public	With my mother and father	Basic education	No formal education	Self employed	Self employed		Yes	Commercially made sanitary pad	No				Plastic bag	Twice	Toilet	Twice daily	Only with water		Yes	4	Others	0	0	0	0	1	No	Always	No	No	Mother	School health	No sex with husband	0	0	0	0	1	0	Prohibition from touching the holy books (Bible or Qur’an)	0	1	0	0
Below 15 years	JHS 2	Dagomba	Islam	Public	With my mother and father	Secondary school	No formal education	Self employed	Self employed		Yes	Commercially made sanitary pad	Yes	In the bath room	Only water	Sunlights	Plastic bag	Twice	Toilet	More than three times a day	Only with water		No								Yes	Sometimes	Yes	Yes	Mother	School health	beliefs	0	1	0	0	0	0	Prohibition from touching the holy books (Bible or Qur’an)	0	1	0	0
15 to 19 years	JHS 3	Dagomba	Islam	Public	Mother only	Secondary school	No formal education	Self employed	Self employed		Yes	Cloth	No				Plastic bag	Twice	Dustbin	Daily	Water and soap		No								Yes	Always	Yes	No	Mother	Family	No sex with husband Others	0	0	0	0	1	1	Prohibition from touching the holy books (Bible or Qur’an) Visiting religious places	0	1	1	0
Below 15 years	JHS 2	Dagomba	Islam	Public	With my mother and father	Basic education	Basic education	Private sector employement	Self employed		Yes	Commercially made sanitary pad	No				Plastic bag	Twice	Toilet	Twice daily	Water and soap		Yes	2	Others	1	0	0	0	1	Yes	Sometimes	Yes	Yes	Mother	School health	My culture does not talk about menses	1	0	0	0	0	0	Prohibition from touching the holy books (Bible or Qur’an)	0	1	0	0
Below 15 years	JHS 2	Dagomba	Islam	Public	Mother only	College diploma & above	College di	Public sector employment	Public sector employment		Yes	Commercially made sanitary pad	Yes	With other cloth	Others	Others	Plastic bag	Twice	Toilet	Three times a day	Only with water		No								No	Sometimes	Yes	Yes	Mother	School health	No sex with husband	0	0	0	0	1	0	Visiting religious places	0	0	1	0
15 to 19 years	JHS 3	Dagomba	Islam	Public	With my mother and father	College diploma & above	No formal education	Self employed	Public sector employment		Yes	Commercially made sanitary pad	No				Plastic bag	Twice	Dustbin	Twice daily	Water and soap		No								No	Sometimes	Yes	Yes	Self	School health	Others	0	0	0	0	0	1	Prohibition from touching the holy books (Bible or Qur’an) Visiting religious places	0	1	1	0
15 to 19 years	JHS 3	Dagomba	Islam	Public	With my mother and father	Secondary school	No formal education	Self employed	Self employed		No										Water and soap		No								No	Always	No	Yes	Self	School health	No sex with husband	0	0	0	0	1	0	Prohibition from touching the holy books (Bible or Qur’an)	0	1	0	0
Below 15 years	JHS 2	Dagomba	Islam	Public	With my mother and father	No formal education	Basic education	Self employed	Self employed		Yes	Commercially made sanitary pad	No				Plastic bag	Twice	Toilet	Twice daily	Only with water		No								No	Always	Yes	Yes	Mother	School health	beliefs	0	1	0	0	0	0	Prohibition from touching the holy books (Bible or Qur’an)	0	1	0	0
15 to 19 years	JHS 3	Dagomba	Islam	Public	Relatives	No formal education	No formal education	Self employed	Self employed		No										Water and soap		No								No	Sometimes	Yes	No	Mother	School health	My culture does not talk about menses	1	0	0	0	0	0	Prohibition on attending religious ceremonies	1	0	0	0
15 to 19 years	JHS 2	Gonja	Islam	Public	Relatives	Basic education	Secondary school	Self employed	Public sector employment		Yes	Commercially made sanitary pad	Yes	In the bath room	Soap and water	Others	Plastic bag	Three and more	Toilet	Twice daily	Only with water		No								Yes	Always	Yes	Yes	Self	School health	Prohibition from cooking in the home No sex with husband	0	0	0	1	1	0	Prohibition from touching the holy books (Bible or Qur’an)	0	1	0	0
Below 15 years	JHS 3	Dagomba	Islam	Private	Relatives	Basic education	Basic education	Self employed	Unemployed		No										Only with water		No								No	Sometimes	Yes	Yes	Mother	Family	No sex with husband	0	0	0	0	1	0	Prohibition from touching the holy books (Bible or Qur’an) Visiting religious places	0	1	1	0
15 to 19 years	JHS 1	Others	Christianity	Private	With my mother and father	Basic education	Basic education	Unemployed	Self employed		Yes	Commercially made sanitary pad	No				Plastic bag	Twice	Dustbin	Twice daily	Water and soap		Yes	2	Pains	1	1	0	0	0	No	Sometimes	No	Yes	Mother	Family	Prohibition from cooking in the home	0	0	0	1	0	0	Visiting religious places	0	0	1	0
15 to 19 years	JHS 3	Dagomba	Islam	Public	Mother only	No formal education	No formal education	Public sector employment	Self employed		Yes	Commercially made sanitary pad	No				Plastic bag	Three and more	Dustbin	Twice daily	Water and soap		No								No	Sometimes	Yes	Yes	Self	School health	No sex with husband Others	0	0	0	0	1	1	Prohibition from touching the holy books (Bible or Qur’an) Visiting religious places	0	1	1	0
Below 15 years	JHS 2	Others	Islam	Public	With my mother and father	No formal education	No formal education	Unemployed	Self employed		Yes	Commercially made sanitary pad	No				Plastic bag	Twice	Toilet	Three times a day	Only with water		No								No	Always	Yes	Yes	Mother	School health	My culture does not talk about menses	1	0	0	0	0	0	Prohibition from touching the holy books (Bible or Qur’an) Visiting religious places	0	1	1	0
Below 15 years	JHS 2	Others	Islam	Public	With my mother and father	Basic education	Basic education	Self employed	Public sector employment		Yes	Commercially made sanitary pad	No				Papers	Three and more	Toilet	Twice daily	Only with water		Yes	2	Staining dress Others	1	1	0	0	1	No	Sometimes	No	Yes	Mother	School health	No sex with husband	0	0	0	0	1	0	Prohibition from touching the holy books (Bible or Qur’an)	0	1	0	0
15 to 19 years	JHS 3	Dagomba	Islam	Public	With my mother and father	No formal education	No formal education	Public sector employment	Self employed		Yes	Commercially made sanitary pad	No				Plastic bag	Three and more	Drain	Three times a day	Water and soap		No								No	Always	Yes	Yes	Mother	Family	No sex with husband Others	0	0	0	0	1	1	Prohibition from touching the holy books (Bible or Qur’an) Visiting religious places	0	1	1	0
Below 15 years	JHS 2	Mamprusi	Islam	Public	With my mother and father	Basic education	College di	Public sector employment	Public sector employment		Yes	Commercially made sanitary pad	Yes	Separately	Others	Others	Plastic bag	Twice	Drain	Twice daily	Water and soap		No								Yes	Sometimes	Yes	Yes	Mother	Media	My culture does not talk about menses	1	0	0	0	0	0	Prohibition on attending religious ceremonies Visiting religious places	1	0	1	0
Below 15 years	JHS 1	Mamprusi	Islam	Public	Mother only	Basic education	Basic education	Self employed	Self employed		Yes	Commercially made sanitary pad	Yes	In the bath room	Soap and water	Others	Plastic bag	Twice	Drain	Daily	Only with water		Yes	2	Staining dress	1	1	0	0	0	No	Always	No	Yes	Self	School health	My culture does not talk about menses Prohibition from cooking in the home	1	0	0	1	0	0	Prohibition on attending religious ceremonies Prohibition from touching the holy books (Bible or Qur’an) Visiting religious places	1	1	1	0
Below 15 years	JHS 1	Dagomba	Islam	Public	With my mother and father	Basic education	College di	Public sector employment	Self employed		Yes	Commercially made sanitary pad	No				Plastic bag	Three and more	Others	Three times a day	Only with water		Yes	2	Others	1	0	0	0	1	Yes	Sometimes	No	Yes	Mother	School health	beliefs	0	1	0	0	0	0	Prohibition from touching the holy books (Bible or Qur’an) Visiting religious places	0	1	1	0
Below 15 years	JHS 3	Dagomba	Islam	Public	With my mother and father	Secondary school	No formal education	Private sector employement	Self employed		Yes	Commercially made sanitary pad	No				Plastic bag	Three and more	Dustbin	Three times a day	Water and soap		Yes	3	Others	1	0	0	0	1	No	Sometimes	Yes	Yes	Mother	Media	beliefs Others	0	1	0	0	0	1	Prohibition from touching the holy books (Bible or Qur’an) Visiting religious places	0	1	1	0
Below 15 years	JHS 1	Dagomba	Islam	Public	With my mother and father	No formal education	No formal education	Self employed	Self employed		Yes	Commercially made sanitary pad	No				Plastic bag	Three and more	Dustbin	Three times a day	Only with water		Yes	4	Others	0	0	0	0	1	Yes	Others	Yes	No	Mother	Family	Others	0	0	0	0	0	1	Others	0	0	0	1
Below 15 years	JHS 1	Dagomba	Islam	Public	With my mother and father	Secondary school	Secondary school	Self employed	Self employed		Yes	Commercially made sanitary pad	No				Plastic bag	Three and more	Dustbin	Twice daily	Only with water		Yes	1	Pains	1	1	0	0	0	Yes	Sometimes	Yes	Yes	Self	School health	beliefs	0	1	0	0	0	0	Prohibition from touching the holy books (Bible or Qur’an) Visiting religious places	0	1	1	0
Below 15 years	JHS 3	Dagomba	Islam	Public	Father only	College diploma & above	Basic education	Unemployed	Self employed		Yes	Commercially made sanitary pad	No				Plastic bag	Three and more	Dustbin	Three times a day	Water and soap		Yes	3	Pains	1	0	0	0	0	Yes	Sometimes	Yes	Yes	Father	School health	Prohibition from cooking in the home	0	0	0	1	0	0	Prohibition from touching the holy books (Bible or Qur’an) Visiting religious places	0	1	1	0
15 to 19 years	JHS 1	Dagomba	Islam	Public	Relatives	No formal education	College di	Self employed	Self employed		Yes	Commercially made sanitary pad	Yes	In the bath room	Soap and water	Sunlights	Plastic bag	Three and more	Dustbin	Twice daily	Water and soap		Yes	4	Others	0	0	0	0	1	Yes	Sometimes	Yes	Yes	Self	School health	No sex with husband	0	0	0	0	1	0	Prohibition from touching the holy books (Bible or Qur’an)	0	1	0	0
15 to 19 years	JHS 3	Dagomba	Islam	Public	With my mother and father	College diploma & above	No formal education	Self employed	Public sector employment		Yes	Commercially made sanitary pad	No				Plastic bag	Three and more	Dustbin	Twice daily	Water and soap		No								Yes	Sometimes	Yes	Yes	Mother	School health	Prohibition from cooking in the home	0	0	0	1	0	0	Prohibition from touching the holy books (Bible or Qur’an)	0	1	0	0
Below 15 years	JHS 3	Dagomba	Islam	Public	Relatives	No formal education	No formal education	Self employed	Self employed		Yes	Commercially made sanitary pad	No				Plastic bag	Twice	Dustbin	Twice daily	Only with water		No								No	Always	No	Yes	Mother	School health	My culture does not talk about menses	1	0	0	0	0	0	Visiting religious places	0	0	1	0
Below 15 years	JHS 3	Dagomba	Islam	Public	With my mother and father	Secondary school	No formal education	Self employed	Self employed		Yes	Commercially made sanitary pad	No				Plastic bag	Three and more	Toilet	Three times a day	Only with water		No								No	Others	Yes	Yes	Mother	Family	Prohibition from cooking in the home	0	0	0	1	0	0	Prohibition from touching the holy books (Bible or Qur’an)	0	1	0	0
15 to 19 years	JHS 3	Dagomba	Islam	Public	With my mother and father	No formal education	No formal education	Self employed	Self employed		Yes	Commercially made sanitary pad	No				Plastic bag	Twice	Dustbin	Twice daily	Water and soap		No								Yes	Sometimes	Yes	No	Mother	School health	No sex with husband	0	0	0	0	1	0	Prohibition from touching the holy books (Bible or Qur’an)	0	1	0	0
Below 15 years	JHS 1	Gonja	Islam	Private	Relatives	Basic education	Basic education	Self employed	Self employed		Yes	Commercially made sanitary pad	No				Plastic bag	Three and more	Toilet	Twice daily	Water and soap		Yes	4	Staining dress	1	1	0	0	0	No	Others	Yes	Yes	Mother	Family	My culture does not talk about menses Others	1	0	0	0	0	1	Prohibition from touching the holy books (Bible or Qur’an) Visiting religious places	0	1	1	0
15 to 19 years	JHS 1	Others	Islam	Private	Relatives	Basic education	No formal education	Self employed	Self employed		Yes	Commercially made sanitary pad	No				Plastic bag	Twice	Others	Daily	Water and soap		No								Yes	Sometimes	Yes	Yes	Mother	School health	beliefs No sex with husband	0	1	0	0	1	0	Prohibition from touching the holy books (Bible or Qur’an)	0	1	0	0
15 to 19 years	JHS 1	Dagomba	Islam	Private	Relatives	No formal education	No formal education	Self employed	Self employed		Yes	Commercially made sanitary pad	No				Plastic bag	Twice	Others	Twice daily	Water and soap		No								Yes	Sometimes	No	No	Mother	School health	No sex with husband	0	0	0	0	1	0	Prohibition from touching the holy books (Bible or Qur’an)	0	1	0	0
15 to 19 years	JHS 1	Gonja	Islam	Private	With my mother and father	No formal education	No formal education	Self employed	Self employed		Yes	Commercially made sanitary pad	No				Plastic bag	Twice	Dustbin	Twice daily	Water and soap		No								No	Always	Yes	Yes	Mother	Family	beliefs No sex with husband	0	1	0	0	1	0	Prohibition from touching the holy books (Bible or Qur’an) Visiting religious places	0	1	1	0
Below 15 years	JHS 2	Dagomba	Islam	Private	With my mother and father	Basic education	No formal education	Self employed	Self employed		Yes	Commercially made sanitary pad	No				Plastic bag	Twice	Open field	Twice daily	Only with water		No								No	Sometimes	Yes	Yes	Mother	Family	beliefs	0	1	0	0	0	0	Prohibition from touching the holy books (Bible or Qur’an) Visiting religious places	0	1	1	0
Below 15 years	JHS 1	Dagomba	Islam	Private	Mother only	Basic education	Basic education	Self employed	Unemployed		Yes	Cloth	Yes	In the bath room	Soap and water	Inside the room	Other	Twice	Others	Twice daily	Water and soap		Yes	3	Pains	1	0	0	0	0	Yes	Others	No	No	Mother	Family	No sex with husband Others	0	0	0	0	1	1	Prohibition from touching the holy books (Bible or Qur’an) Visiting religious places	0	1	1	0
Below 15 years	JHS 2	Dagomba	Islam	Private	With my mother and father	No formal education	No formal education	Self employed	Self employed		Yes	Commercially made sanitary pad	No				Plastic bag	Twice	Others	Twice daily	Only with water		No								No	Sometimes	Yes	Yes	Mother	School health	beliefs No sex with husband	0	1	0	0	1	0	Prohibition from touching the holy books (Bible or Qur’an) Visiting religious places	0	1	1	0
15 to 19 years	JHS 1	Dagomba	Islam	Private	With my mother and father	Basic education	No formal education	Self employed	Self employed		Yes	Commercially made sanitary pad	No				Plastic bag	Twice	Dustbin	Twice daily	Water and soap		No								No	Sometimes	Yes	Yes	Father	School health	beliefs	0	1	0	0	0	0	Visiting religious places	0	0	1	0
15 to 19 years	JHS 1	Gonja	Islam	Private	Mother only	Secondary school	No formal education	Self employed	Self employed		Yes	Cloth	Yes	In the bath room	Soap and water	Sunlights	Other	Three and more	Others	Twice daily	Tissue paper		No								No	Sometimes	Yes	Yes	Mother	School health	Others	0	0	0	0	0	1	Prohibition from touching the holy books (Bible or Qur’an) Visiting religious places	0	1	1	0
15 to 19 years	JHS 1	Dagomba	Islam	Private	Mother only	No formal education	No formal education	Self employed	Self employed		Yes	Commercially made sanitary pad	No				Plastic bag	Twice	Others	Twice daily	Only with water		No								Yes	Always	Yes	Yes	Mother	School health	beliefs No sex with husband	0	1	0	0	1	0	Prohibition from touching the holy books (Bible or Qur’an) Visiting religious places Others	0	1	1	1
15 to 19 years	JHS 1	Dagomba	Islam	Private	With my mother and father	College diploma & above	Secondary school	Unemployed	Public sector employment		Yes	Cloth	Yes	In the bath room	Soap and water	Inside the room	Other	Twice	Others	Twice daily	Only with water		No								Yes	Sometimes	Yes	Yes	Mother	Others	beliefs	0	1	0	0	0	0	Prohibition from touching the holy books (Bible or Qur’an) Visiting religious places Others	0	1	1	1
Below 15 years	JHS 2	Dagomba	Islam	Private	With my mother and father	Secondary school	Basic education	Self employed	Self employed		Yes	Commercially made sanitary pad	No				Not wrap	Twice	Toilet	Twice daily	Only with water		No								Yes	Always	Yes	Yes	Mother	Family	No sex with husband	0	0	0	0	1	0	Prohibition from touching the holy books (Bible or Qur’an) Visiting religious places	0	1	1	0
15 to 19 years	JHS 1	Dagomba	Islam	Private	With my mother and father	College diploma & above	College di	Public sector employment	Public sector employment		Yes	Commercially made sanitary pad	No				Papers	Three and more	Drain	Three times a day	Water and soap		No								No	Always	Yes	Yes	Mother	Family	Prohibition from cooking in the home	0	0	0	1	0	0	Prohibition from touching the holy books (Bible or Qur’an) Visiting religious places	0	1	1	0
15 to 19 years	JHS 2	Dagomba	Islam	Private	With my mother and father	Basic education	Basic education	Self employed	Self employed		Yes	Commercially made sanitary pad	No				Plastic bag	Twice	Toilet	Twice daily	Water and soap		No								No	Always	Yes	Yes	Mother	School health	beliefs No sex with husband	0	1	0	0	1	0	Prohibition from touching the holy books (Bible or Qur’an) Visiting religious places	0	1	1	0
15 to 19 years	JHS 2	Dagomba	Islam	Private	With my mother and father	Secondary school	Basic education	Self employed	Self employed		Yes	Commercially made sanitary pad	No				Plastic bag	Twice	Toilet	Twice daily	Water and soap		No								No	Always	No	Yes	Father	Family	Prohibition from cooking in the home	0	0	0	1	0	0	Prohibition from touching the holy books (Bible or Qur’an) Visiting religious places	0	1	1	0
Below 15 years	JHS 2	Dagomba	Islam	Private	With my mother and father	No formal education	No formal education	Self employed	Self employed		Yes	Commercially made sanitary pad	No				Not wrap	Twice	Drain	Twice daily	Only with water		No								No	Others	No	No	Mother	Family	My culture does not talk about menses Prohibition from cooking in the home	1	0	0	1	0	0	Prohibition from touching the holy books (Bible or Qur’an) Visiting religious places	0	1	1	0
15 to 19 years	JHS 2	Dagomba	Islam	Private	Relatives	Basic education	Basic education	Self employed	Self employed		Yes	Commercially made sanitary pad	No				Plastic bag	Twice	Dustbin	Three times a day	Water and soap		No								Yes	Sometimes	Yes	Yes	Mother	Family	beliefs No sex with husband	0	1	0	0	1	0	Prohibition from touching the holy books (Bible or Qur’an) Visiting religious places	0	1	1	0
15 to 19 years	JHS 2	Dagomba	Islam	Private	Mother only	No formal education	No formal education	Self employed	Self employed		Yes	Commercially made sanitary pad	No				Plastic bag	Twice	Dustbin	Twice daily	Water and soap		No								Yes	Always	Yes	Yes	Self	School health	beliefs No sex with husband	0	1	0	0	1	0	Prohibition from touching the holy books (Bible or Qur’an) Visiting religious places Others	0	1	1	1
15 to 19 years	JHS 1	Dagomba	Islam	Private	With my mother and father	College diploma & above	Basic education	Unemployed	Public sector employment		Yes	Cloth	Yes	Separately	Soap and water	Sunlights	Other	Twice	Others	Twice daily	Only with water		No								No	Others	No	Yes	Mother	School health	Prohibition from cooking in the home	0	0	0	1	0	0	Prohibition from touching the holy books (Bible or Qur’an) Visiting religious places	0	1	1	0
15 to 19 years	JHS 2	Dagomba	Islam	Public	With my mother and father	No formal education	No formal education	Self employed	Self employed		Yes	Commercially made sanitary pad	No				Plastic bag	Twice	Dustbin	Twice daily	Water and soap		No								Yes	Always	Yes	Yes	Mother	Family	beliefs No sex with husband	0	1	0	0	1	0	Prohibition from touching the holy books (Bible or Qur’an) Visiting religious places Others	0	1	1	1
15 to 19 years	JHS 2	Dagomba	Islam	Private	Relatives	Secondary school	Basic education	Self employed	Self employed		Yes	Commercially made sanitary pad	No				Not wrap	Twice	Others	Twice daily	Only with water		No								No	Sometimes	Yes	Yes	Mother	Family	Prohibition from cooking in the home No sex with husband	0	0	0	1	1	0	Prohibition from touching the holy books (Bible or Qur’an) Visiting religious places	0	1	1	0
Below 15 years	JHS 2	Dagomba	Islam	Private	With my mother and father	No formal education	No formal education	Self employed	Self employed		Yes	Commercially made sanitary pad	No				Plastic bag	Twice	Toilet	Twice daily	Tissue paper		No								No	Sometimes	Yes	No	Mother	School health	My culture does not talk about menses Prohibition from cooking in the home Others	1	0	0	1	0	1	Prohibition on attending religious ceremonies Prohibition from touching the holy books (Bible or Qur’an) Visiting religious places	1	1	1	0
15 to 19 years	JHS 2	Dagomba	Islam	Private	With my mother and father	No formal education	No formal education	Public sector employment	Public sector employment		Yes	Commercially made sanitary pad	No				Plastic bag	Twice	Others	Twice daily	Only with water		No								Yes	Always	Yes	Yes	Mother	School health	beliefs No sex with husband	0	1	0	0	1	0	Prohibition from touching the holy books (Bible or Qur’an) Visiting religious places Others	0	1	1	1
15 to 19 years	JHS 2	Dagomba	Islam	Private	With my mother and father	Secondary school	Basic education	Self employed	Self employed		Yes	Commercially made sanitary pad	No				Plastic bag	Three and more	Dustbin	Twice daily	Only with water		No								No	Sometimes	Yes	Yes	Mother	Family	Prohibition from cooking in the home	0	0	0	1	0	0	Prohibition from touching the holy books (Bible or Qur’an) Visiting religious places	0	1	1	0
15 to 19 years	JHS 1	Dagomba	Islam	Private	With my mother and father	College diploma & above	No formal education	Self employed	Public sector employment		Yes	Commercially made sanitary pad	No				Plastic bag	Twice	Dustbin	Twice daily	Only with water		No								No	Others	Yes	Yes	Mother	Family	My culture does not talk about menses Prohibition from cooking in the home	1	0	0	1	0	0	Prohibition from touching the holy books (Bible or Qur’an) Visiting religious places	0	1	1	0
15 to 19 years	JHS 2	Dagomba	Islam	Private	With my mother and father	Basic education	No formal education	Self employed	Self employed		Yes	Commercially made sanitary pad	No				Plastic bag	Twice	Others	Three times a day	Only with water		No								Yes	Always	Yes	Yes	Father	School health	beliefs No sex with husband	0	1	0	0	1	0	Prohibition from touching the holy books (Bible or Qur’an) Visiting religious places Others	0	1	1	1
15 to 19 years	JHS 2	Dagomba	Islam	Private	With my mother and father	Basic education	Basic education	Self employed	Self employed		Yes	Commercially made sanitary pad	No				Plastic bag	Twice	Dustbin	Twice daily	Only with water		No								No	Sometimes	Yes	Yes	Mother	Family	beliefs Prohibition from cooking in the home No sex with husband	0	1	0	1	1	0	Prohibition from touching the holy books (Bible or Qur’an) Visiting religious places	0	1	1	0
15 to 19 years	JHS 2	Dagomba	Islam	Private	With my mother and father	No formal education	No formal education	Self employed	Self employed		Yes	Commercially made sanitary pad	No				Plastic bag	Twice	Others	Twice daily	Only with water		No								Yes	Always	Yes	Yes	Mother	School health	beliefs No sex with husband	0	1	0	0	1	0	Prohibition from touching the holy books (Bible or Qur’an) Visiting religious places Others	0	1	1	1
15 to 19 years	JHS 2	Dagomba	Islam	Private	With my mother and father	Basic education	No formal education	Self employed	Self employed		Yes	Commercially made sanitary pad	No				Plastic bag	Twice	Toilet	Twice daily	Water and soap		No								Yes	Sometimes	Yes	Yes	Father	Family	beliefs No sex with husband	0	1	0	0	1	0	Prohibition from touching the holy books (Bible or Qur’an) Visiting religious places Others	0	1	1	1
15 to 19 years	JHS 2	Others	Islam	Private	Mother only	Basic education	No formal education	Self employed	Self employed		Yes	Commercially made sanitary pad	No				Papers	Twice	Dustbin	Twice daily	Only with water		Yes	2	Pains	1	0	0	0	0	Yes	Sometimes	Yes	Yes	Mother	School health	No sex with husband	0	0	0	0	1	0	Prohibition from touching the holy books (Bible or Qur’an) Visiting religious places	0	1	1	0
Below 15 years	JHS 1	Gonja	Islam	Private	With my mother and father	Basic education	No formal education	Self employed	Self employed		Yes	Commercially made sanitary pad	No				Plastic bag	Twice	Toilet	Twice daily	Only with water		No								No	Sometimes	Yes	Yes	Mother	Family	Prohibition from cooking in the home	0	0	0	1	0	0	Prohibition from touching the holy books (Bible or Qur’an)	0	1	0	0
Below 15 years	JHS 1	Gonja	Islam	Private	With my mother and father	No formal education	No formal education	Self employed	Self employed		Yes	Commercially made sanitary pad	No				Plastic bag	Twice	Dustbin	Twice daily	Water and soap		No								No	Always	Yes	Yes	Mother	School health	beliefs No sex with husband	0	1	0	0	1	0	Prohibition from touching the holy books (Bible or Qur’an) Visiting religious places Others	0	1	1	1
15 to 19 years	JHS 1	Dagomba	Islam	Private	Mother only	Basic education	Basic education	Self employed	Self employed		Yes	Commercially made sanitary pad	No				Not wrap	Twice	Others	Twice daily	Only with water		Yes	2	Pains	1	0	0	0	0	No	Sometimes	Yes	Yes	Mother	School health	Prohibition from cooking in the home	0	0	0	1	0	0	Prohibition from touching the holy books (Bible or Qur’an) Visiting religious places	0	1	1	0
Below 15 years	JHS 2	Dagomba	Islam	Private	Mother only	Secondary school	Basic education	Self employed	Self employed		Yes	Commercially made sanitary pad	No				Not wrap	Twice	Toilet	Twice daily	Only with water		No								No	Sometimes	Yes	Yes	Mother	School health	No sex with husband	0	0	0	0	1	0	Prohibition from touching the holy books (Bible or Qur’an) Visiting religious places	0	1	1	0
15 to 19 years	JHS 1	Gonja	Islam	Private	Relatives	Basic education	Basic education	Self employed	Self employed		Yes	Commercially made sanitary pad	No				Plastic bag	Once	Others	Twice daily	Water and soap		No								Yes	Sometimes	Yes	Yes	Mother	School health	beliefs Prohibition from cooking in the home	0	1	0	1	0	0	Prohibition from touching the holy books (Bible or Qur’an) Visiting religious places Others	0	1	1	1
15 to 19 years	JHS 3	Dagomba	Islam	Private	With my mother and father	Secondary school	Basic education	Self employed	Self employed		Yes	Commercially made sanitary pad	No				Plastic bag	Twice	Dustbin	Twice daily	Only with water		No								No	Sometimes	Yes	Yes	Mother	School health	Prohibition from cooking in the home	0	0	0	1	0	0	Prohibition from touching the holy books (Bible or Qur’an) Visiting religious places	0	1	1	0
Below 15 years	JHS 2	Dagomba	Islam	Private	With my mother and father	Secondary school	Basic education	Self employed	Self employed		Yes	Commercially made sanitary pad	No				Plastic bag	Three and more	Dustbin	Twice daily	Only with water		No								No	Sometimes	Yes	Yes	Mother	Family	No sex with husband	0	0	0	0	1	0	Prohibition from touching the holy books (Bible or Qur’an)	0	1	0	0
15 to 19 years	JHS 2	Dagomba	Islam	Private	With my mother and father	Basic education	Basic education	Unemployed	Self employed		Yes	Commercially made sanitary pad	No				Plastic bag	Twice	Dustbin	Twice daily	Only with water		No								No	Sometimes	Yes	Yes	Father	School health	Prohibition from cooking in the home No sex with husband	0	0	0	1	1	0	Prohibition from touching the holy books (Bible or Qur’an) Visiting religious places	0	1	1	0
Below 15 years	JHS 1	Dagomba	Islam	Private	With my mother and father	Secondary school	Basic education	Self employed	Self employed		Yes	Commercially made sanitary pad	No				Not wrap	Twice	Toilet	Twice daily	Only with water		No								No	Sometimes	Yes	Yes	Mother	School health	Prohibition from cooking in the home	0	0	0	1	0	0	Prohibition from touching the holy books (Bible or Qur’an) Others	0	1	0	1
15 to 19 years	JHS 1	Dagomba	Islam	Private	Mother only	Basic education	Basic education	Self employed	Self employed		Yes	Commercially made sanitary pad	No				Plastic bag	Twice	Dustbin	Twice daily	Water and soap		No								No	Sometimes	Yes	No	Mother	School health	beliefs Prohibition from cooking in the home	0	1	0	1	0	0	Prohibition from touching the holy books (Bible or Qur’an) Visiting religious places Others	0	1	1	1
15 to 19 years	JHS 1	Dagomba	Islam	Private	With my mother and father	Basic education	Basic education	Self employed	Self employed		Yes	Cloth	Yes	With other cloth	Soap and water	Inside the room	Not wrap	Once	Toilet	Twice daily	Only with water		No								Yes	Sometimes	No	Yes	Self	School health	beliefs No sex with husband	0	1	0	0	1	0	Prohibition from touching the holy books (Bible or Qur’an)	0	1	0	0
Below 15 years	JHS 1	Dagomba	Islam	Private	With my mother and father	Basic education	Basic education	Self employed	Self employed		Yes	Commercially made sanitary pad	No				Plastic bag	Twice	Open field	Twice daily	Only with water		Yes	2	Pains	1	0	0	0	0	No	Sometimes	Yes	Yes	Mother	Family	Prohibition from cooking in the home No sex with husband	0	0	0	1	1	0	Prohibition from touching the holy books (Bible or Qur’an) Visiting religious places Others	0	1	1	1
15 to 19 years	JHS 2	Dagomba	Islam	Private	With my mother and father	Basic education	Basic education	Self employed	Self employed		Yes	Commercially made sanitary pad	No				Plastic bag	Twice	Drain	Three times a day	Water and soap		No								No	Sometimes	Yes	Yes	Mother	School health	beliefs No sex with husband	0	1	0	0	1	0	Prohibition from touching the holy books (Bible or Qur’an) Visiting religious places Others	0	1	1	1
15 to 19 years	JHS 3	Dagomba	Islam	Private	With my mother and father	Secondary school	Basic education	Self employed	Self employed		Yes	Commercially made sanitary pad	No				Plastic bag	Twice	Dustbin	Twice daily	Only with water		No								Yes	Sometimes	Yes	Yes	Mother	Family	Prohibition from cooking in the home	0	0	0	1	0	0	Prohibition from touching the holy books (Bible or Qur’an) Visiting religious places	0	1	1	0
Below 15 years	JHS 2	Dagomba	Islam	Private	With my mother and father	College diploma & above	Secondary school	Public sector employment	Public sector employment		Yes	Commercially made sanitary pad	No				Plastic bag	Twice	Dustbin	Twice daily	Water and soap		No								No	Sometimes	Yes	No	Mother	Family	My culture does not talk about menses Prohibition from cooking in the home	1	0	0	1	0	0	Prohibition on attending religious ceremonies Prohibition from touching the holy books (Bible or Qur’an) Visiting religious places	1	1	1	0
15 to 19 years	JHS 1	Dagomba	Islam	Private	With my mother and father	No formal education	No formal education	Self employed	Self employed		Yes	Commercially made sanitary pad	No				Plastic bag	Twice	Others	Twice daily	Water and soap		No								Yes	Always	Yes	Yes	Mother	School health	beliefs No sex with husband	0	1	0	0	1	0	Prohibition from touching the holy books (Bible or Qur’an) Visiting religious places Others	0	1	1	1
15 to 19 years	JHS 1	Dagomba	Islam	Private	With my mother and father	No formal education	Secondary school	Self employed	Self employed		Yes	Commercially made sanitary pad	No				Plastic bag	Twice	Toilet	Twice daily	Water and soap		No								No	Sometimes	Yes	Yes	Mother	Family	beliefs	0	1	0	0	0	0	Prohibition from touching the holy books (Bible or Qur’an)	0	1	0	0
Below 15 years	JHS 1	Dagomba	Islam	Private	With my mother and father	Secondary school	No formal education	Self employed	Self employed		Yes	Commercially made sanitary pad	No				Plastic bag	Twice	Toilet	Twice daily	Water and soap		No								No	Always	Yes	Yes	Mother	School health	beliefs No sex with husband	0	1	0	0	1	0	Prohibition from touching the holy books (Bible or Qur’an) Visiting religious places	0	1	1	0
15 to 19 years	JHS 3	Dagomba	Islam	Private	With my mother and father	No formal education	Basic education	Self employed	Self employed		Yes	Cloth	Yes	With other cloth	Soap and water	Sunlights	Plastic bag	Twice	Open field	Twice daily	Only with water		No								Yes	Sometimes	Yes	Yes	Self	Family	Prohibition from cooking in the home	0	0	0	1	0	0	Prohibition from touching the holy books (Bible or Qur’an) Visiting religious places	0	1	1	0
15 to 19 years	JHS 2	Dagomba	Islam	Private	Father only	No formal education	Basic education	Self employed	Self employed		Yes	Commercially made sanitary pad	No				Plastic bag	Three and more	Dustbin	More than three times a day	Water and soap		No								Yes	Always	Yes	Yes	Father	School health	beliefs No sex with husband	0	1	0	0	1	0	Prohibition from touching the holy books (Bible or Qur’an) Visiting religious places	0	1	1	0
15 to 19 years	JHS 1	Dagomba	Islam	Private	Mother only	No formal education	Basic education	Self employed	Self employed		Yes	Commercially made sanitary pad	No				Plastic bag	Twice	Dustbin	Twice daily	Tissue paper		No								No	Sometimes	Yes	Yes	Mother	Family	Prohibition from cooking in the home No sex with husband	0	0	0	1	1	0	Prohibition from touching the holy books (Bible or Qur’an) Visiting religious places	0	1	1	0
15 to 19 years	JHS 1	Dagomba	Islam	Private	With my mother and father	No formal education	No formal education	Self employed	Self employed		Yes	Commercially made sanitary pad	No				Plastic bag	Twice	Others	Twice daily	Water and soap		No								Yes	Always	Yes	Yes	Mother	School health	beliefs No sex with husband	0	1	0	0	1	0	Prohibition from touching the holy books (Bible or Qur’an) Visiting religious places	0	1	1	0
15 to 19 years	JHS 3	Dagomba	Islam	Private	Mother only	No formal education	Basic education	Self employed	Self employed		Yes	Cloth	Yes	With other cloth	Soap and water	Sunlights	Not wrap	Twice	Open field	Twice daily	Only with water		No								No	Sometimes	Yes	Yes	Mother	Family	Prohibition from cooking in the home No sex with husband	0	0	0	1	1	0	Prohibition from touching the holy books (Bible or Qur’an) Visiting religious places	0	1	1	0
Below 15 years	JHS 1	Dagomba	Islam	Private	With my mother and father	No formal education	No formal education	Self employed	Self employed		Yes	Commercially made sanitary pad	No				Plastic bag	Three and more	Dustbin	Twice daily	Water and soap		Yes	4	Pains	1	0	0	0	0	No	Others	Yes	Yes	Mother	School health	My culture does not talk about menses No sex with husband	1	0	0	0	1	0	Prohibition from touching the holy books (Bible or Qur’an) Visiting religious places	0	1	1	0
15 to 19 years	JHS 2	Dagomba	Islam	Private	With my mother and father	Basic education	No formal education	Self employed	Self employed		Yes	Commercially made sanitary pad	No				Plastic bag	Twice	Others	Twice daily	Water and soap		No								Yes	Sometimes	Yes	Yes	Mother	Family	Prohibition from cooking in the home	0	0	0	1	0	0	Prohibition from touching the holy books (Bible or Qur’an) Visiting religious places	0	1	1	0
15 to 19 years	JHS 2	Dagomba	Islam	Private	Relatives	No formal education	No formal education	Self employed	Self employed		Yes	Commercially made sanitary pad	No				Plastic bag	Three and more	Dustbin	Three times a day	Water and soap		No								Yes	Always	Yes	Yes	Father	School health	beliefs No sex with husband	0	1	0	0	1	0	Prohibition from touching the holy books (Bible or Qur’an) Visiting religious places	0	1	1	0
Below 15 years	JHS 2	Dagomba	Islam	Private	With my mother and father	College diploma & above	No formal education	Self employed	Self employed		Yes	Commercially made sanitary pad	No				Plastic bag	Twice	Dustbin	Twice daily	Water and soap		No								No	Sometimes	No	Yes	Mother	School health	My culture does not talk about menses	1	0	0	0	0	0	Prohibition from touching the holy books (Bible or Qur’an)	0	1	0	0
15 to 19 years	JHS 1	Dagomba	Islam	Private	With my mother and father	Secondary school	Secondary school	Self employed	Self employed		Yes	Commercially made sanitary pad	No				Plastic bag	Twice	Others	Three times a day	Only with water		No								Yes	Always	Yes	No	Father	School health	beliefs No sex with husband	0	1	0	0	1	0	Prohibition from touching the holy books (Bible or Qur’an) Visiting religious places	0	1	1	0
Below 15 years	JHS 2	Dagomba	Islam	Private	With my mother and father	No formal education	No formal education	Unemployed	Self employed		Yes	Commercially made sanitary pad	No				Plastic bag	Twice	Dustbin	Twice daily	Water and soap		No								Yes	Sometimes	Yes	Yes	Mother	Family	Prohibition from cooking in the home	0	0	0	1	0	0	Prohibition from touching the holy books (Bible or Qur’an) Visiting religious places	0	1	1	0
15 to 19 years	JHS 1	Dagomba	Islam	Private	With my mother and father	Secondary school	No formal education	Self employed	Self employed		Yes	Commercially made sanitary pad	No				Plastic bag	Three and more	Dustbin	Three times a day	Water and soap		No								Yes	Sometimes	Yes	Yes	Mother	School health	Prohibition from cooking in the home Others	0	0	0	1	0	1	Prohibition on attending religious ceremonies Prohibition from touching the holy books (Bible or Qur’an) Visiting religious places	1	1	1	0
15 to 19 years	JHS 2	Dagomba	Islam	Private	With my mother and father	No formal education	No formal education	Self employed	Self employed		Yes	Commercially made sanitary pad	No				Not wrap	Twice	Toilet	Three times a day	Water and soap		No								No	Always	Yes	Yes	Mother	School health	beliefs No sex with husband	0	1	0	0	1	0	Prohibition from touching the holy books (Bible or Qur’an) Visiting religious places	0	1	1	0
15 to 19 years	JHS 1	Dagomba	Islam	Private	With my mother and father	Secondary school	No formal education	Self employed	Self employed		Yes	Commercially made sanitary pad	Yes	Separately	Soap and water	Sunlights	Other	Three and more	Others	Twice daily	Only with water		No								No	Sometimes	Yes	Yes	NGO	School health	Prohibition from cooking in the home	0	0	0	1	0	0	Prohibition from touching the holy books (Bible or Qur’an) Visiting religious places	0	1	1	0
15 to 19 years	JHS 2	Dagomba	Islam	Private	With my mother and father	College diploma & above	Basic education	Self employed	Public sector employment		Yes	Cloth	Yes	With other cloth	Soap and water	Sunlights	Other	Twice	Others	Twice daily	Water and soap		No								No	Sometimes	Yes	Yes	Mother	School health	beliefs No sex with husband	0	1	0	0	1	0	Prohibition from touching the holy books (Bible or Qur’an) Visiting religious places	0	1	1	0
15 to 19 years	JHS 1	Dagomba	Islam	Private	Relatives	No formal education	No formal education	Unemployed	Unemployed		Yes	Commercially made sanitary pad	No				Plastic bag	Twice	Open field	Twice daily	Water and soap		No								No	Sometimes	Yes	Yes	Friends	Family	My culture does not talk about menses Prohibition from cooking in the home No sex with husband	1	0	0	1	1	0	Prohibition from touching the holy books (Bible or Qur’an) Visiting religious places	0	1	1	0
15 to 19 years	JHS 1	Others	Islam	Private	Mother only	No formal education	No formal education	Self employed	Self employed		Yes	Commercially made sanitary pad	No				Plastic bag	Three and more	Open field	Twice daily	Towel		No								Yes	Sometimes	Yes	Yes	Father	Family	Prohibition from cooking in the home No sex with husband	0	0	0	1	1	0	Prohibition from touching the holy books (Bible or Qur’an) Visiting religious places	0	1	1	0
Below 15 years	JHS 1	Dagomba	Islam	Private	With my mother and father	No formal education	No formal education	Self employed	Self employed		Yes	Commercially made sanitary pad	No				Plastic bag	Three and more	Dustbin	Three times a day	Water and soap		Yes	4	Staining dress	0	1	0	0	0	Yes	Sometimes	Yes	Yes	Mother	School health	My culture does not talk about menses	1	0	0	0	0	0	Prohibition from touching the holy books (Bible or Qur’an)	0	1	0	0
15 to 19 years	JHS 1	Dagomba	Islam	Private	With my mother and father	No formal education	No formal education	Self employed	Self employed		Yes	Commercially made sanitary pad	No				Plastic bag	Twice	Dustbin	Twice daily	Water and soap		No								No	Sometimes	Yes	Yes	Mother	School health	beliefs No sex with husband	0	1	0	0	1	0	Prohibition from touching the holy books (Bible or Qur’an) Visiting religious places	0	1	1	0
Below 15 years	JHS 2	Dagomba	Islam	Private	With my mother and father	Secondary school	Basic education	Self employed	Self employed		Yes	Commercially made sanitary pad	No				Plastic bag	Twice	Dustbin	Twice daily	Only with water		No								No	Sometimes	Yes	Yes	Father	Family	Prohibition from cooking in the home No sex with husband	0	0	0	1	1	0	Prohibition from touching the holy books (Bible or Qur’an) Visiting religious places	0	1	1	0
15 to 19 years	JHS 1	Dagomba	Islam	Private	Mother only	No formal education	No formal education	Self employed	Self employed		Yes	Commercially made sanitary pad	No				Plastic bag	Twice	Toilet	Twice daily	Only with water		No								No	Others	No	Yes	Mother	Family	My culture does not talk about menses beliefs Prohibition from cooking in the home	1	1	0	1	0	0	Prohibition on attending religious ceremonies Prohibition from touching the holy books (Bible or Qur’an) Visiting religious places	1	1	1	0
Below 15 years	JHS 2	Dagomba	Islam	Private	With my mother and father	Basic education	No formal education	Self employed	Public sector employment		Yes	Commercially made sanitary pad	No				Plastic bag	Twice	Dustbin	Twice daily	Only with water		Yes	2	Pains	1	0	0	0	0	No	Sometimes	Yes	Yes	Mother	School health	Prohibition from cooking in the home No sex with husband	0	0	0	1	1	0	Prohibition from touching the holy books (Bible or Qur’an) Visiting religious places	0	1	1	0
Below 15 years	JHS 1	Dagomba	Islam	Private	With my mother and father	Secondary school	Basic education	Self employed	Self employed		Yes	Commercially made sanitary pad	No				Plastic bag	Twice	Open field	Twice daily	Water and soap		No								Yes	Always	Yes	Yes	Mother	School health	beliefs No sex with husband	0	1	0	0	1	0	Prohibition from touching the holy books (Bible or Qur’an) Visiting religious places	0	1	1	0
15 to 19 years	JHS 1	Dagomba	Islam	Private	With my mother and father	Secondary school	Basic education	Self employed	Public sector employment		Yes	Commercially made sanitary pad	No				Plastic bag	Twice	Open field	Twice daily	Only with water		Yes	2	Pains	1	0	0	0	0	Yes	Sometimes	Yes	Yes	Mother	Family	Prohibition from cooking in the home No sex with husband	0	0	0	1	1	0	Prohibition from touching the holy books (Bible or Qur’an) Visiting religious places	0	1	1	0
15 to 19 years	JHS 2	Gonja	Islam	Private	With my mother and father	Secondary school	No formal education	Self employed	Self employed		Yes	Commercially made sanitary pad	No				Plastic bag	Twice	Others	Twice daily	Water and soap		No								Yes	Always	Yes	Yes	Self	School health	beliefs Prohibition from cooking in the home No sex with husband	0	1	0	1	1	0	Prohibition from touching the holy books (Bible or Qur’an) Visiting religious places	0	1	1	0
15 to 19 years	JHS 1	Dagomba	Islam	Private	Mother only	No formal education	No formal education	Self employed	Self employed		Yes	Commercially made sanitary pad	No				Plastic bag	Three and more	Dustbin	Twice daily	Water and soap		No								No	Sometimes	Yes	Yes	Mother	School health	beliefs	0	1	0	0	0	0	Prohibition from touching the holy books (Bible or Qur’an)	0	1	0	0
Below 15 years	JHS 1	Dagomba	Islam	Private	With my mother and father	No formal education	No formal education	Self employed	Self employed		Yes	Commercially made sanitary pad	No				Plastic bag	Once	Toilet	Twice daily	Water and soap		Yes	2	Shyness	0	0	1	0	0	No	Others	No	Yes	Mother	Family	My culture does not talk about menses Prohibition from cooking in the home No sex with husband	1	0	0	1	1	0	Prohibition on attending religious ceremonies Prohibition from touching the holy books (Bible or Qur’an) Visiting religious places Others	1	1	1	1
15 to 19 years	JHS 3	Dagomba	Islam	Private	With my mother and father	No formal education	College di	Public sector employment	Self employed		Yes	Commercially made sanitary pad	No				Plastic bag	Twice	Toilet	Twice daily	Only with water		No								No	Sometimes	Yes	Yes	Father	Family	beliefs	0	1	0	0	0	0	Prohibition from touching the holy books (Bible or Qur’an) Visiting religious places	0	1	1	0
15 to 19 years	JHS 3	Dagomba	Islam	Private	Relatives	Secondary school	Basic education	Self employed	Self employed		Yes	Commercially made sanitary pad	No				Plastic bag	Twice	Dustbin	Twice daily	Only with water		No								Yes	Sometimes	Yes	Yes	Mother	School health	beliefs No sex with husband	0	1	0	0	1	0	Prohibition from touching the holy books (Bible or Qur’an) Visiting religious places	0	1	1	0
Below 15 years	JHS 3	Others	Islam	Private	Relatives	College diploma & above	Secondary school	Public sector employment	Public sector employment		Yes	Commercially made sanitary pad	No				Plastic bag	Twice	Open field	Twice daily	Water and soap		No								No	Sometimes	Yes	Yes	Mother	School health	beliefs No sex with husband	0	1	0	0	1	0	Prohibition from touching the holy books (Bible or Qur’an) Visiting religious places	0	1	1	0
Below 15 years	JHS 3	Dagomba	Islam	Private	With my mother and father	No formal education	No formal education	Self employed	Self employed		Yes	Cloth	Yes	Separately	Soap and water	Inside the room	Other	Twice	Dustbin	Twice daily	Towel		No								No	Sometimes	Yes	Yes	NGO	Family	No sex with husband	0	0	0	0	1	0	Prohibition from touching the holy books (Bible or Qur’an) Visiting religious places	0	1	1	0
15 to 19 years	JHS 3	Dagomba	Islam	Private	With my mother and father	Basic education	Secondary school	Self employed	Public sector employment		Yes	Cloth	Yes	Separately	Soap and water	Inside the room	Other	Twice	Others	Twice daily	Only with water		Yes	2	Pains	1	1	0	0	0	No	Sometimes	Yes	Yes	NGO	Family	No sex with husband	0	0	0	0	1	0	Prohibition from touching the holy books (Bible or Qur’an) Visiting religious places	0	1	1	0
15 to 19 years	JHS 3	Dagomba	Islam	Private	With my mother and father	Basic education	No formal education	Unemployed	Self employed		Yes	Commercially made sanitary pad	No				Plastic bag	Twice	Dustbin	Twice daily	Water and soap		No								Yes	Sometimes	Yes	Yes	Mother	School health	beliefs	0	1	0	0	0	0	Prohibition from touching the holy books (Bible or Qur’an)	0	1	0	0
15 to 19 years	JHS 1	Dagomba	Islam	Private	With my mother and father	Basic education	No formal education	Self employed	Self employed		Yes	Commercially made sanitary pad	No				Other	Twice	Toilet	Twice daily	Water and soap		No								Yes	Sometimes	No	No	Mother	Family	No sex with husband	0	0	0	0	1	0	Others	0	0	0	1
15 to 19 years	JHS 3	Gonja	Islam	Private	With my mother and father	College diploma & above	College di	Public sector employment	Public sector employment		Yes	Commercially made sanitary pad	No				Plastic bag	Twice	Others	Twice daily	Only with water		No								No	Sometimes	Yes	Yes	Father	Family	Prohibition from cooking in the home	0	0	0	1	0	0	Prohibition from touching the holy books (Bible or Qur’an) Visiting religious places	0	1	1	0
Below 15 years	JHS 3	Others	Islam	Private	With my mother and father	No formal education	No formal education	Self employed	Self employed		Yes	Commercially made sanitary pad	No				Plastic bag	Twice	Others	Twice daily	Water and soap		No								Yes	Sometimes	Yes	Yes	Mother	School health	beliefs No sex with husband	0	1	0	0	1	0	Prohibition from touching the holy books (Bible or Qur’an) Visiting religious places	0	1	1	0
Below 15 years	JHS 1	Dagomba	Islam	Private	Mother only	No formal education	Basic education	Private sector employement	Self employed		Yes	Commercially made sanitary pad	Yes	In the bath room	Soap and water	Sunlights	Plastic bag	Three and more	Dustbin	Three times a day	Water and soap		No								No	Others	Yes	Yes	Mother	School health	Others	0	0	0	0	0	1	Prohibition from touching the holy books (Bible or Qur’an)	0	1	0	0
15 to 19 years	JHS 3	Dagomba	Islam	Private	With my mother and father	Basic education	No formal education	Self employed	Public sector employment		Yes	Commercially made sanitary pad	No				Not wrap	Twice	Toilet	Twice daily	Only with water		No								No	Sometimes	Yes	Yes	Mother	Family	beliefs No sex with husband	0	1	0	0	1	0	Prohibition from touching the holy books (Bible or Qur’an) Visiting religious places	0	1	1	0
15 to 19 years	JHS 3	Dagomba	Islam	Private	With my mother and father	No formal education	No formal education	Unemployed	Self employed		Yes	Commercially made sanitary pad	No				Plastic bag	Twice	Others	Twice daily	Water and soap		No								No	Always	Yes	Yes	Mother	School health	beliefs No sex with husband	0	1	0	0	1	0	Prohibition from touching the holy books (Bible or Qur’an) Visiting religious places	0	1	1	0
15 to 19 years	JHS 3	Dagomba	Islam	Private	With my mother and father	Basic education	Secondary school	Self employed	Self employed		Yes	Commercially made sanitary pad	No				Plastic bag	Twice	Others	Twice daily	Only with water		No								No	Sometimes	Yes	Yes	Mother	Family	No sex with husband	0	0	0	0	1	0	Prohibition from touching the holy books (Bible or Qur’an) Visiting religious places	0	1	1	0
15 to 19 years	JHS 3	Dagomba	Islam	Private	With my mother and father	No formal education	No formal education	Self employed	Self employed		Yes	Commercially made sanitary pad	No				Plastic bag	Twice	Dustbin	Twice daily	Water and soap		No								Yes	Sometimes	Yes	Yes	Mother	School health	beliefs No sex with husband	0	1	0	0	1	0	Prohibition from touching the holy books (Bible or Qur’an) Visiting religious places	0	1	1	0
Below 15 years	JHS 1	Dagomba	Islam	Private	Mother only	No formal education	Secondary school	Self employed	Self employed		No										Only with water		Yes	2	Pains	1	0	0	0	0	No	Sometimes	Yes	No	Mother	Family	No sex with husband	0	0	0	0	1	0	Prohibition from touching the holy books (Bible or Qur’an)	0	1	0	0
15 to 19 years	JHS 3	Gonja	Islam	Private	Relatives	No formal education	No formal education	Self employed	Self employed		Yes	Commercially made sanitary pad	No				Plastic bag	Twice	Dustbin	Twice daily	Water and soap		No								Yes	Sometimes	Yes	Yes	Self	School health	beliefs No sex with husband	0	1	0	0	1	0	Prohibition from touching the holy books (Bible or Qur’an) Visiting religious places	0	1	1	0
15 to 19 years	JHS 3	Dagomba	Islam	Private	With my mother and father	Basic education	No formal education	Self employed	Self employed		Yes	Commercially made sanitary pad	No				Not wrap	Twice	Toilet	Twice daily	Only with water		No								No	Sometimes	Yes	Yes	Mother	School health	No sex with husband	0	0	0	0	1	0	Prohibition from touching the holy books (Bible or Qur’an) Visiting religious places	0	1	1	0
15 to 19 years	JHS 3	Dagomba	Islam	Private	With my mother and father	Secondary school	Basic education	Self employed	Self employed		Yes	Commercially made sanitary pad	No				Plastic bag	Twice	Toilet	Twice daily	Only with water		No								No	Sometimes	Yes	Yes	Mother	Family	No sex with husband	0	0	0	0	1	0	Prohibition from touching the holy books (Bible or Qur’an) Visiting religious places	0	1	1	0
Below 15 years	JHS 3	Dagomba	Islam	Private	With my mother and father	No formal education	No formal education	Self employed	Self employed		Yes	Commercially made sanitary pad	No				Plastic bag	Twice	Dustbin	Twice daily	Water and soap		No								No	Sometimes	Yes	Yes	Mother	School health	beliefs No sex with husband	0	1	0	0	1	0	Prohibition from touching the holy books (Bible or Qur’an) Visiting religious places	0	1	1	0
15 to 19 years	JHS 3	Dagomba	Islam	Private	Mother only	Basic education	Basic education	Unemployed	Self employed		Yes	Commercially made sanitary pad	No				Plastic bag	Twice	Open field	Twice daily	Water and soap		No								Yes	Sometimes	Yes	Yes	Mother	School health	beliefs No sex with husband	0	1	0	0	1	0	Prohibition from touching the holy books (Bible or Qur’an) Visiting religious places	0	1	1	0
15 to 19 years	JHS 3	Dagomba	Islam	Private	With my mother and father	Basic education	No formal education	Self employed	Self employed		Yes	Commercially made sanitary pad	No				Plastic bag	Twice	Dustbin	Twice daily	Only with water		No								No	Sometimes	Yes	Yes	Mother	Family	No sex with husband	0	0	0	0	1	0	Prohibition from touching the holy books (Bible or Qur’an) Visiting religious places	0	1	1	0
Below 15 years	JHS 1	Dagomba	Islam	Private	With my mother and father	Basic education	No formal education	Self employed	Self employed		Yes	Commercially made sanitary pad	No				Plastic bag	Three and more	Dustbin	Twice daily	Water and soap		Yes	1	Pains	1	1	0	0	0	No	Others	Yes	Yes	Self	School health	My culture does not talk about menses Prohibition from cooking in the home	1	0	0	1	0	0	Prohibition on attending religious ceremonies Prohibition from touching the holy books (Bible or Qur’an) Visiting religious places	1	1	1	0
Below 15 years	JHS 2	Dagomba	Islam	Private	With my mother and father	No formal education	No formal education	Self employed	Self employed		Yes	Commercially made sanitary pad	Yes	In the bath room	Soap and water	Sunlights	Plastic bag	Twice	Dustbin	Twice daily	Water and soap		No								No	Sometimes	No	No	Self	School health	No sex with husband	0	0	0	0	1	0	Prohibition from touching the holy books (Bible or Qur’an)	0	1	0	0
15 to 19 years	JHS 3	Dagomba	Islam	Private	With my mother and father	Secondary school	Basic education	Self employed	Public sector employment		Yes	Commercially made sanitary pad	No				Plastic bag	Twice	Open field	Twice daily	Only with water		No								No	Sometimes	Yes	Yes	Self	School health	beliefs No sex with husband	0	1	0	0	1	0	Prohibition from touching the holy books (Bible or Qur’an) Visiting religious places	0	1	1	0
15 to 19 years	JHS 3	Dagomba	Islam	Private	With my mother and father	Basic education	No formal education	Self employed	Self employed		Yes	Commercially made sanitary pad	No				Plastic bag	Twice	Toilet	Twice daily	Only with water		No								No	Sometimes	Yes	Yes	Mother	Family	beliefs No sex with husband	0	1	0	0	1	0	Prohibition from touching the holy books (Bible or Qur’an) Visiting religious places	0	1	1	0
15 to 19 years	JHS 3	Dagomba	Islam	Private	With my mother and father	No formal education	No formal education	Self employed	Self employed		Yes	Commercially made sanitary pad	No				Plastic bag	Twice	Dustbin	Twice daily	Water and soap		No								No	Sometimes	Yes	Yes	Father	Family	No sex with husband	0	0	0	0	1	0	Prohibition from touching the holy books (Bible or Qur’an) Visiting religious places	0	1	1	0
15 to 19 years	JHS 3	Dagomba	Christianity	Private	Relatives	Basic education	Basic education	Self employed	Self employed		Yes	Commercially made sanitary pad	No				Plastic bag	Twice	Open field	Twice daily	Only with water		No								No	Sometimes	Yes	No	Self	School health	beliefs No sex with husband	0	1	0	0	1	0	Prohibition from touching the holy books (Bible or Qur’an) Visiting religious places	0	1	1	0
15 to 19 years	JHS 3	Dagomba	Islam	Private	Father only	Secondary school	Basic education	Self employed	Private sector employment		Yes	Commercially made sanitary pad	No				Plastic bag	Twice	Dustbin	Twice daily	Only with water		No								No	Sometimes	Yes	Yes	Self	School health	No sex with husband	0	0	0	0	1	0	Prohibition from touching the holy books (Bible or Qur’an) Visiting religious places	0	1	1	0
15 to 19 years	JHS 3	Others	Islam	Private	Mother only	Basic education	Basic education	Self employed	Public sector employment		Yes	Commercially made sanitary pad	No				Plastic bag	Twice	Others	Twice daily	Only with water		No								Yes	Sometimes	Yes	Yes	Mother	School health	beliefs No sex with husband	0	1	0	0	1	0	Prohibition from touching the holy books (Bible or Qur’an) Visiting religious places	0	1	1	0
15 to 19 years	JHS 3	Dagomba	Islam	Private	With my mother and father	Basic education	No formal education	Self employed	Public sector employment		Yes	Commercially made sanitary pad	No				Papers	Twice	Dustbin	Twice daily	Tissue paper		No								No	Sometimes	Yes	Yes	Mother	Family	beliefs No sex with husband	0	1	0	0	1	0	Prohibition from touching the holy books (Bible or Qur’an) Visiting religious places	0	1	1	0
Below 15 years	JHS 3	Dagomba	Islam	Private	With my mother and father	Basic education	No formal education	Self employed	Self employed		Yes	Commercially made sanitary pad	No				Plastic bag	Twice	Dustbin	Twice daily	Only with water		No								No	Always	Yes	Yes	Mother	School health	beliefs No sex with husband	0	1	0	0	1	0	Prohibition from touching the holy books (Bible or Qur’an) Visiting religious places	0	1	1	0
15 to 19 years	JHS 3	Dagomba	Islam	Private	Mother only	Secondary school	No formal education	Self employed	Self employed		Yes	Commercially made sanitary pad	No				Plastic bag	Twice	Dustbin	Twice daily	Water and soap		No								No	Sometimes	Yes	Yes	Mother	Family	Prohibition from cooking in the home	0	0	0	1	0	0	Prohibition from touching the holy books (Bible or Qur’an) Visiting religious places	0	1	1	0
15 to 19 years	JHS 3	Dagomba	Islam	Private	Mother only	College diploma & above	Basic education	Self employed	Public sector employment		Yes	Commercially made sanitary pad	No				Plastic bag	Twice	Toilet	Twice daily	Tissue paper		No								Yes	Others	No	No	Mother	Family	My culture does not talk about menses Prohibition from cooking in the home Others	1	0	0	1	0	1	Prohibition on attending religious ceremonies Prohibition from touching the holy books (Bible or Qur’an) Visiting religious places	1	1	1	0
15 to 19 years	JHS 3	Dagomba	Islam	Private	With my mother and father	Basic education	No formal education	Self employed	Self employed		Yes	Commercially made sanitary pad	No				Plastic bag	Twice	Dustbin	Three times a day	Tissue paper		No								No	Sometimes	Yes	Yes	Mother	Family	No sex with husband	0	0	0	0	1	0	Prohibition from touching the holy books (Bible or Qur’an) Visiting religious places	0	1	1	0
15 to 19 years	JHS 3	Dagomba	Islam	Private	Mother only	No formal education	No formal education	Self employed	Self employed		Yes	Commercially made sanitary pad	No				Plastic bag	Twice	Dustbin	Twice daily	Water and soap		No								No	Sometimes	Yes	Yes	Mother	School health	beliefs No sex with husband	0	1	0	0	1	0	Prohibition from touching the holy books (Bible or Qur’an) Visiting religious places	0	1	1	0
Below 15 years	JHS 3	Dagomba	Islam	Private	Mother only	Basic education	No formal education	Self employed	Self employed		Yes	Commercially made sanitary pad	No				Plastic bag	Twice	Dustbin	Twice daily	Water and soap		No								No	Sometimes	Yes	Yes	Mother	Family	No sex with husband	0	0	0	0	1	0	Prohibition from touching the holy books (Bible or Qur’an) Visiting religious places	0	1	1	0
15 to 19 years	JHS 3	Dagomba	Islam	Private	With my mother and father	Basic education	Basic education	Self employed	Self employed		Yes	Commercially made sanitary pad	No				Plastic bag	Twice	Toilet	Twice daily	Only with water		No								No	Sometimes	Yes	Yes	Mother	Family	No sex with husband	0	0	0	0	1	0	Prohibition from touching the holy books (Bible or Qur’an) Visiting religious places	0	1	1	0
15 to 19 years	JHS 3	Dagomba	Islam	Private	Mother only	Basic education	Basic education	Self employed	Self employed		Yes	Commercially made sanitary pad	No				Plastic bag	Twice	Dustbin	Twice daily	Only with water		No								No	Sometimes	Yes	Yes	Mother	Family	No sex with husband	0	0	0	0	1	0	Prohibition from touching the holy books (Bible or Qur’an) Visiting religious places	0	1	1	0
15 to 19 years	JHS 3	Dagomba	Islam	Private	With my mother and father	Basic education	Basic education	Self employed	Self employed		Yes	Commercially made sanitary pad	No				Plastic bag	Twice	Dustbin	Twice daily	Only with water		No								No	Sometimes	Yes	Yes	Mother	Family	No sex with husband	0	0	0	0	1	0	Prohibition from touching the holy books (Bible or Qur’an) Visiting religious places	0	1	1	0
15 to 19 years	JHS 1	Mamprusi	Islam	Private	Father only	Basic education	No formal education	Self employed	Self employed		Yes	Commercially made sanitary pad	No				Papers	Three and more	Toilet	Daily	Only with water		No								No	Always	Yes	Yes	Self	Workshop	My culture does not talk about menses No sex with husband	1	0	0	0	1	0	Prohibition on attending religious ceremonies Prohibition from touching the holy books (Bible or Qur’an) Visiting religious places	1	1	1	0
15 to 19 years	JHS 3	Dagomba	Islam	Private	With my mother and father	Secondary school	Basic education	Self employed	Self employed		Yes	Commercially made sanitary pad	No				Not wrap	Once	Toilet	Twice daily	Only with water		No								No	Sometimes	Yes	Yes	Self	Family	Prohibition from cooking in the home	0	0	0	1	0	0	Prohibition from touching the holy books (Bible or Qur’an) Visiting religious places	0	1	1	0
15 to 19 years	JHS 3	Dagomba	Islam	Private	Mother only	Basic education	Basic education	Self employed	Self employed		Yes	Commercially made sanitary pad	No				Plastic bag	Twice	Toilet	Twice daily	Only with water		Yes	2	Pains	1	1	0	0	0	No	Sometimes	Yes	Yes	Mother	Family	Prohibition from cooking in the home	0	0	0	1	0	0	Prohibition from touching the holy books (Bible or Qur’an) Visiting religious places	0	1	1	0
15 to 19 years	JHS 2	Gonja	Islam	Private	Mother only	No formal education	No formal education	Self employed	Self employed		Yes	Commercially made sanitary pad	No				Not wrap	Once	Open field	Daily	Water and soap		Yes	2	Staining dress	0	1	0	0	0	No	Sometimes	Yes	Yes	Self	School health	My culture does not talk about menses beliefs Others	1	1	0	0	0	1	Prohibition on attending religious ceremonies Prohibition from touching the holy books (Bible or Qur’an) Visiting religious places	1	1	1	0
15 to 19 years	JHS 2	Mamprusi	Islam	Private	With my mother and father	Basic education	No formal education	Self employed	Self employed		Yes	Tissue paper	No				Not wrap	Three and more	Toilet	Twice daily	Water and soap		Yes	2	Staining dress	0	1	0	0	0	No	Sometimes	Yes	Yes	Self	School health	My culture does not talk about menses beliefs	1	1	0	0	0	0	Prohibition on attending religious ceremonies Prohibition from touching the holy books (Bible or Qur’an) Visiting religious places	1	1	1	0
Below 15 years	JHS 1	Dagomba	Islam	Private	Mother only	No formal education	No formal education	Unemployed	Self employed		Yes	Commercially made sanitary pad	No				Plastic bag	Three and more	Drain	Twice daily	Only with water		Yes	4	Stigma	0	0	0	1	0	Yes	Sometimes	No	No	Self	Others	My culture does not talk about menses beliefs No sex with husband	1	1	0	0	1	0	Prohibition from touching the holy books (Bible or Qur’an) Visiting religious places	0	1	1	0
Below 15 years	JHS 2	Dagomba	Islam	Private	With my mother and father	No formal education	No formal education	Self employed	Self employed		Yes	Commercially made sanitary pad	Yes	Separately	Soap and water	Others	Plastic bag	Three and more	Dustbin	Three times a day	Water and soap		No								Yes	Sometimes	Yes	Yes	Mother	Family	beliefs	0	1	0	0	0	0	Prohibition on attending religious ceremonies Prohibition from touching the holy books (Bible or Qur’an) Others	1	1	0	1
Below 15 years	JHS 3	Dagomba	Islam	Private	Relatives	Basic education	Basic education	Self employed	Unemployed		No										Water and soap		No								No	Sometimes	Yes	Yes	Mother	Family	No sex with husband	0	0	0	0	1	0	Prohibition from touching the holy books (Bible or Qur’an) Visiting religious places	0	1	1	0
15 to 19 years	JHS 1	Others	Christianity	Private	With my mother and father	Basic education	Basic education	Unemployed	Self employed		Yes	Commercially made sanitary pad	No				Plastic bag	Twice	Dustbin	Twice daily	Water and soap		No								No	Sometimes	No	Yes	Mother	Family	Prohibition from cooking in the home	0	0	0	1	0	0	Visiting religious places	0	0	1	0
Below 15 years	JHS 1	Gonja	Islam	Private	Relatives	Basic education	Basic education	Self employed	Self employed		Yes	Commercially made sanitary pad	No				Plastic bag	Three and more	Toilet	Twice daily	Only with water		Yes	4	Staining dress	0	1	0	0	0	No	Others	Yes	Yes	Mother	Family	My culture does not talk about menses Others	1	0	0	0	0	1	Prohibition from touching the holy books (Bible or Qur’an) Visiting religious places	0	1	1	0
Below 15 years	JHS 1	Others	Islam	Private	Relatives	Basic education	No formal education	Self employed	Self employed		Yes	Commercially made sanitary pad	No				Plastic bag	Twice	Others	Daily	Water and soap		No								Yes	Sometimes	Yes	Yes	Mother	School health	beliefs No sex with husband	0	1	0	0	1	0	Prohibition from touching the holy books (Bible or Qur’an)	0	1	0	0
15 to 19 years	JHS 1	Dagomba	Islam	Private	Relatives	No formal education	No formal education	Self employed	Self employed		Yes	Commercially made sanitary pad	No				Plastic bag	Twice	Others	Twice daily	Water and soap		No								Yes	Sometimes	No	No	Mother	School health	No sex with husband	0	0	0	0	1	0	Prohibition from touching the holy books (Bible or Qur’an)	0	1	0	0
15 to 19 years	JHS 1	Gonja	Islam	Private	With my mother and father	No formal education	No formal education	Self employed	Self employed		Yes	Commercially made sanitary pad	No				Plastic bag	Twice	Dustbin	Twice daily	Water and soap		No								No	Always	Yes	Yes	Mother	Family	beliefs No sex with husband	0	1	0	0	1	0	Prohibition from touching the holy books (Bible or Qur’an) Visiting religious places	0	1	1	0
Below 15 years	JHS 2	Dagomba	Islam	Private	With my mother and father	Basic education	No formal education	Self employed	Self employed		Yes	Commercially made sanitary pad	No				Plastic bag	Twice	Open field	Twice daily	Water and soap		No								No	Sometimes	Yes	Yes	Mother	Family	beliefs	0	1	0	0	0	0	Prohibition from touching the holy books (Bible or Qur’an) Visiting religious places	0	1	1	0
Below 15 years	JHS 1	Dagomba	Islam	Private	Mother only	Basic education	Basic education	Self employed	Unemployed		Yes	Cloth	Yes	In the bath room	Soap and water	Inside the room	Other	Twice	Others	Twice daily	Water and soap		Yes	3	Pains	1	0	0	0	0	Yes	Others	No	No	Mother	Family	No sex with husband Others	0	0	0	0	1	1	Prohibition from touching the holy books (Bible or Qur’an) Visiting religious places	0	1	1	0
Below 15 years	JHS 1	Dagomba	Islam	Private	With my mother and father	No formal education	No formal education	Self employed	Self employed		Yes	Commercially made sanitary pad	No				Plastic bag	Twice	Others	Twice daily	Only with water		No								No	Sometimes	Yes	Yes	Mother	School health	beliefs No sex with husband	0	1	0	0	1	0	Prohibition from touching the holy books (Bible or Qur’an) Visiting religious places	0	1	1	0
15 to 19 years	JHS 1	Dagomba	Islam	Private	With my mother and father	Basic education	No formal education	Self employed	Self employed		Yes	Commercially made sanitary pad	No				Plastic bag	Twice	Dustbin	Twice daily	Water and soap		No								No	Sometimes	Yes	Yes	Father	School health	beliefs	0	1	0	0	0	0	Visiting religious places	0	0	1	0
15 to 19 years	JHS 1	Gonja	Islam	Private	Mother only	Secondary school	No formal education	Self employed	Self employed		Yes	Cloth	Yes	In the bath room	Soap and water	Sunlights	Other	Three and more	Others	Twice daily	Tissue paper		No								No	Sometimes	Yes	Yes	Mother	School health	Others	0	0	0	0	0	1	Prohibition from touching the holy books (Bible or Qur’an) Visiting religious places	0	1	1	0
15 to 19 years	JHS 1	Dagomba	Islam	Private	Mother only	No formal education	No formal education	Self employed	Self employed		Yes	Commercially made sanitary pad	No				Plastic bag	Twice	Others	Twice daily	Only with water		No								Yes	Always	Yes	Yes	Mother	School health	beliefs No sex with husband	0	1	0	0	1	0	Prohibition from touching the holy books (Bible or Qur’an) Visiting religious places Others	0	1	1	1
Below 15 years	JHS 1	Dagomba	Islam	Private	With my mother and father	College diploma & above	Secondary school	Unemployed	Public sector employment		Yes	Cloth	Yes	In the bath room	Soap and water	Inside the room	Other	Twice	Others	Twice daily	Only with water		No								Yes	Sometimes	Yes	Yes	Mother	Others	beliefs	0	1	0	0	0	0	Prohibition from touching the holy books (Bible or Qur’an) Visiting religious places Others	0	1	1	1
Below 15 years	JHS 1	Dagomba	Islam	Private	With my mother and father	Secondary school	Basic education	Self employed	Self employed		Yes	Commercially made sanitary pad	No				Not wrap	Twice	Toilet	Twice daily	Only with water		No								Yes	Always	Yes	Yes	Mother	Family	No sex with husband	0	0	0	0	1	0	Prohibition from touching the holy books (Bible or Qur’an) Visiting religious places	0	1	1	0
15 to 19 years	JHS 1	Dagomba	Islam	Private	With my mother and father	College diploma & above	College di	Public sector employment	Public sector employment		Yes	Commercially made sanitary pad	No				Papers	Three and more	Drain	Three times a day	Water and soap		No								No	Always	Yes	Yes	Mother	Family	Prohibition from cooking in the home	0	0	0	1	0	0	Prohibition from touching the holy books (Bible or Qur’an) Visiting religious places	0	1	1	0
Below 15 years	JHS 3	Dagomba	Islam	Public	With my mother and father	No formal education	No formal education	Self employed	Self employed		Yes	Commercially made sanitary pad	No				Plastic bag	Three and more	Dustbin	Three times a day	Only with water		Yes	4	Others	0	0	0	0	1	Yes	Others	Yes	No	Mother	Family	Others	0	0	0	0	0	1	Others	0	0	0	1
Below 15 years	JHS 1	Dagomba	Islam	Public	With my mother and father	Secondary school	Secondary school	Self employed	Self employed		Yes	Commercially made sanitary pad	No				Plastic bag	Three and more	Dustbin	Twice daily	Only with water		Yes	1	Pains	1	1	0	0	0	Yes	Sometimes	Yes	Yes	Self	School health	beliefs	0	1	0	0	0	0	Prohibition from touching the holy books (Bible or Qur’an) Visiting religious places	0	1	1	0
15 to 19 years	JHS 3	Dagomba	Islam	Public	Father only	College diploma & above	Basic education	Unemployed	Self employed		Yes	Commercially made sanitary pad	No				Plastic bag	Three and more	Dustbin	Three times a day	Water and soap		Yes	3	Pains	1	0	0	0	0	Yes	Sometimes	Yes	Yes	Father	School health	Prohibition from cooking in the home	0	0	0	1	0	0	Prohibition from touching the holy books (Bible or Qur’an) Visiting religious places	0	1	1	0
15 to 19 years	JHS 1	Dagomba	Islam	Public	Relatives	No formal education	College di	Self employed	Self employed		Yes	Commercially made sanitary pad	Yes	In the bath room	Soap and water	Sunlights	Plastic bag	Three and more	Dustbin	Twice daily	Water and soap		Yes	4	Others	0	0	0	0	1	Yes	Sometimes	Yes	Yes	Self	School health	No sex with husband	0	0	0	0	1	0	Prohibition from touching the holy books (Bible or Qur’an)	0	1	0	0
15 to 19 years	JHS 3	Dagomba	Islam	Public	With my mother and father	College diploma & above	No formal education	Self employed	Public sector employment		Yes	Commercially made sanitary pad	No				Plastic bag	Three and more	Dustbin	Twice daily	Water and soap		No								Yes	Sometimes	Yes	Yes	Mother	School health	Prohibition from cooking in the home	0	0	0	1	0	0	Prohibition from touching the holy books (Bible or Qur’an)	0	1	0	0
Below 15 years	JHS 3	Dagomba	Islam	Public	Relatives	No formal education	No formal education	Self employed	Self employed		Yes	Commercially made sanitary pad	No				Plastic bag	Twice	Dustbin	Twice daily	Only with water		No								No	Always	No	Yes	Mother	School health	My culture does not talk about menses	1	0	0	0	0	0	Visiting religious places	0	0	1	0
Below 15 years	JHS 3	Dagomba	Islam	Public	With my mother and father	Secondary school	No formal education	Self employed	Self employed		Yes	Commercially made sanitary pad	No				Plastic bag	Three and more	Toilet	Three times a day	Only with water		No								No	Others	Yes	Yes	Mother	Family	Prohibition from cooking in the home	0	0	0	1	0	0	Prohibition from touching the holy books (Bible or Qur’an)	0	1	0	0
15 to 19 years	JHS 3	Dagomba	Islam	Public	With my mother and father	No formal education	No formal education	Self employed	Self employed		Yes	Commercially made sanitary pad	No				Plastic bag	Twice	Dustbin	Twice daily	Water and soap		No								Yes	Sometimes	Yes	No	Mother	School health	No sex with husband	0	0	0	0	1	0	Prohibition from touching the holy books (Bible or Qur’an)	0	1	0	0

## Sheet: Logit
Have you ever absented yourself from school due to menstruation?	Age	Form	Category of school?	Whom do you live with at present?	What is your father’s educational level?	What is your mother’s educational level?	Category of employment of mother?	Category of employment of father?
0	2	3	2	3	2	2	1	1
0	1	3	2	3	2	2	2	1
0	2	3	2	1	2	2	1	1
0	2	2	2	2	1	1	2	2
0	2	1	2	2	1	2	3	2
0	2	2	2	2	1	1	2	2
0	2	1	2	2	1	2	3	1
0	1	1	2	3	2	2	2	1
0	2	1	2	1	1	1	3	2
0	1	1	2	1	1	1	2	2
0	2	1	2	1	1	1	2	2
0	1	2	2	2	1	1	3	2
0	2	1	2	1	1	1	2	2
1	2	2	2	1	2	1	2	1
1	1	3	2	2	1	2	1	1
1	1	1	2	1	1	1	3	2
0	2	3	2	1	1	1	2	2
0	2	3	2	1	1	1	2	1
1	2	1	2	3	1	1	2	2
0	1	3	2	1	1	1	2	2
1	1	1	2	1	1	1	1	1
1	1	2	2	1	2	1	2	1
1	1	1	2	1	1	1	2	2
1	1	3	2	1	2	1	2	1
0	1	3	2	1	1	1	2	2
0	2	2	1	1	2	2	1	1
0	1	1	1	1	2	1	2	2
0	2	1	1	3	1	1	2	2
0	2	2	1	1	1	1	2	2
0	1	1	1	2	1	1	2	2
0	2	1	1	1	2	1	2	1
0	2	1	1	2	2	1	2	1
0	2	1	1	2	2	1	2	2
0	2	3	1	1	1	2	2	2
0	1	1	1	2	1	1	2	2
1	1	1	2	1	1	1	1	2
0	2	1	1	1	1	1	3	2
0	2	1	1	2	1	2	2	2
0	2	2	1	1	1	1	2	2
0	1	1	1	1	1	1	2	2
1	2	3	1	3	1	2	1	1
1	1	3	1	1	1	2	1	3
0	2	3	1	1	1	1	2	2
0	2	2	1	1	2	2	1	1
0	2	3	2	1	2	1	2	1
0	2	3	2	2	1	1	2	2
0	2	3	2	3	1	1	2	2
0	2	3	2	1	2	1	2	1
0	2	3	2	1	1	1	2	2
0	1	3	2	1	2	1	2	2
0	2	3	2	1	1	1	2	2
0	2	3	2	2	2	2	1	1
0	2	3	2	3	2	1	2	1
0	2	3	2	1	2	1	2	2
0	2	3	2	3	2	1	2	2
0	2	3	2	1	1	2	2	2
0	2	3	2	3	1	2	2	2
0	2	3	2	1	1	1	2	2
0	2	3	1	2	1	1	2	2
0	2	2	1	1	2	1	2	1
0	2	2	2	1	1	1	2	3
0	1	2	2	1	2	2	1	1
0	2	2	2	1	1	1	2	2
0	2	2	2	2	1	1	2	2
0	1	1	2	1	1	1	3	2
0	2	1	2	2	1	1	3	2
0	2	1	2	1	1	1	2	2
0	2	3	2	1	1	1	2	2
0	2	3	2	1	1	1	2	2
0	1	3	2	1	1	1	2	1
0	2	3	2	1	1	1	2	2
0	2	3	2	2	1	1	2	1
0	2	3	2	1	2	1	2	1
0	2	3	2	1	1	1	2	2
0	2	3	2	2	1	1	2	3
0	2	3	1	2	2	2	2	1
0	1	1	2	1	1	1	2	2
0	2	2	2	2	1	1	2	2
0	2	1	2	1	1	1	2	2
0	1	2	2	1	2	2	1	1
0	2	1	2	1	2	1	3	3
0	2	2	2	3	1	1	2	2
0	2	2	2	1	1	1	2	2
0	1	1	1	1	1	1	2	2
0	1	2	2	2	1	1	2	2
0	2	1	2	1	1	1	2	2
0	2	2	2	2	1	1	2	2
0	1	2	2	1	1	1	2	2
0	1	2	2	2	1	2	2	2
0	2	1	2	3	1	1	2	2
0	1	2	2	1	1	1	2	2
0	1	2	2	1	1	1	2	2
0	1	2	2	3	1	1	2	2
0	2	2	2	1	1	1	2	2
0	2	2	2	1	1	1	2	1
0	2	2	2	3	2	1	2	2
0	2	2	2	1	1	1	2	2
0	1	2	2	2	2	2	1	1
0	2	2	2	1	1	1	2	1
0	2	2	2	1	2	1	2	3
0	1	2	2	3	1	1	2	2
0	1	2	2	1	1	1	2	2
0	1	2	2	1	1	1	2	2
0	1	2	2	1	1	1	2	2
0	1	2	2	1	1	1	2	1
0	2	2	2	1	1	1	3	2
0	1	2	2	1	2	2	2	1
0	1	2	2	1	1	1	2	2
0	1	2	2	3	1	1	3	2
0	1	2	2	1	2	2	1	1
0	2	2	2	2	1	2	2	2
0	1	2	2	2	1	1	2	3
0	1	2	2	1	1	1	2	1
0	1	2	2	1	1	1	2	2
0	1	2	2	1	1	1	2	3
1	1	1	2	1	1	1	2	2
1	1	2	2	2	2	1	2	1
1	1	1	2	1	1	1	2	2
1	1	2	2	1	1	1	1	3
1	2	1	2	1	1	1	2	2
1	1	1	2	1	2	1	2	1
1	1	3	2	2	2	1	2	3
1	2	1	2	1	1	1	2	2
1	1	3	2	2	1	2	1	2
1	1	1	2	3	1	1	1	2
1	1	3	2	2	1	2	2	1
1	2	2	2	1	2	1	2	1
0	1	3	2	1	1	1	2	2
1	1	2	2	1	1	1	2	2
0	1	3	2	1	1	1	2	2
1	1	1	2	1	2	1	2	2
0	1	3	2	2	1	1	2	2
0	2	3	2	2	2	1	2	2
1	2	2	2	2	1	1	2	2
1	1	1	2	1	2	1	2	2
1	2	2	2	1	1	1	2	2
1	1	2	2	3	2	2	2	1
1	1	1	2	1	2	2	2	1
1	2	3	2	2	1	1	2	2
0	2	3	2	1	1	1	2	3
1	1	2	2	1	1	1	2	2
1	1	3	2	2	2	1	2	1
1	2	2	2	1	1	1	2	2
1	1	1	2	3	1	1	2	2
0	1	2	2	1	2	2	1	2
0	2	2	2	1	1	1	2	2
0	2	2	2	2	1	1	2	2
0	1	2	2	1	2	2	2	2
0	1	2	2	1	2	1	2	2
0	2	2	2	1	2	2	1	1
0	2	2	2	1	1	1	2	2
0	2	2	2	1	1	1	2	2
0	2	3	2	1	2	1	2	2
1	1	1	2	1	2	1	3	1
1	1	2	2	1	2	1	2	2
0	2	3	2	1	1	1	2	2
0	2	2	2	3	2	2	1	2
0	1	2	2	1	1	1	2	2
1	2	3	2	1	1	1	2	2
1	2	2	2	1	2	2	2	2
0	1	2	2	2	1	1	2	1
0	2	3	2	2	2	1	2	2
1	2	1	2	2	2	1	2	2
1	1	1	2	3	2	2	1	1
0	1	2	2	1	2	2	1	1
0	2	3	2	1	2	1	2	2
1	1	2	2	1	1	1	2	2
0	1	2	2	1	2	1	2	2
0	2	3	2	2	2	1	2	2
1	1	2	2	1	1	1	1	2
0	1	2	2	2	2	2	1	1
0	2	3	2	1	2	1	2	1
0	2	3	2	1	2	1	2	2
0	1	2	2	1	1	1	2	2
0	2	3	2	3	1	1	2	2
0	2	2	2	3	1	2	2	1
0	1	3	1	3	1	1	2	3
1	2	1	1	1	1	1	3	2
0	2	3	2	2	1	1	1	2
0	1	2	2	1	1	1	3	2
1	1	2	2	1	1	1	2	1
0	2	3	2	1	1	1	1	2
0	1	2	2	1	1	2	1	1
1	1	1	2	2	1	1	2	2
1	1	1	2	1	1	2	1	2
1	1	3	2	1	2	1	1	2
1	1	1	2	1	1	1	2	2
1	1	1	2	1	2	2	2	2
1	1	3	2	2	2	1	3	2
1	2	1	2	3	1	2	2	2
0	2	3	2	1	2	1	2	1
0	1	3	2	3	1	1	2	2
0	1	3	2	1	2	1	2	2
0	2	3	2	1	1	1	2	2
1	1	1	1	3	1	1	2	2
0	2	1	1	3	1	1	2	2
0	2	1	1	3	1	1	2	2
0	2	1	1	1	1	1	2	2
0	1	2	1	1	1	1	2	2
1	1	1	1	2	1	1	2	3
0	1	2	1	1	1	1	2	2
0	2	1	1	1	1	1	2	2
0	2	1	1	2	2	1	2	2
0	2	1	1	2	1	1	2	2
0	2	1	1	1	2	2	3	1
0	1	2	1	1	2	1	2	2
0	2	1	1	1	2	2	1	1
0	2	2	1	1	1	1	2	2
0	2	2	1	1	2	1	2	2
0	1	2	1	1	1	1	2	2
0	2	2	1	3	1	1	2	2
0	2	2	1	2	1	1	2	2
0	2	1	1	1	2	1	3	1
0	2	2	2	1	1	1	2	2
0	2	2	1	3	2	1	2	2
0	1	2	1	1	1	1	2	2
0	2	2	1	1	1	1	1	1
0	2	2	1	1	2	1	2	2
0	2	1	1	1	2	1	2	1
0	2	2	1	1	1	1	2	2
0	2	2	1	1	1	1	2	2
0	2	2	1	1	1	1	2	2
0	2	2	1	1	1	1	2	2
1	2	2	1	2	1	1	2	2
0	1	1	1	1	1	1	2	2
0	1	1	1	1	1	1	2	2
1	2	1	1	2	1	1	2	2
0	1	2	1	2	2	1	2	2
0	2	1	1	3	1	1	2	2
0	2	3	1	1	2	1	2	2
0	1	2	1	1	2	1	2	2
0	2	2	1	1	1	1	3	2
0	1	1	1	1	2	1	2	2
0	2	1	1	2	1	1	2	2
0	2	1	1	1	1	1	2	2
1	1	1	1	1	1	1	2	2
0	2	2	1	1	1	1	2	2
0	2	3	1	1	2	1	2	2
0	1	2	1	1	2	2	1	1
0	2	1	1	1	1	1	2	2
0	2	1	1	1	1	2	2	2
0	1	1	1	1	2	1	2	2
0	2	3	1	1	1	1	2	2
0	2	2	1	2	1	1	2	2
0	2	1	1	2	1	1	2	2
0	2	1	1	1	1	1	2	2
0	2	3	1	2	1	1	2	2
1	1	1	1	1	1	1	2	2
0	2	2	1	1	1	1	2	2
0	2	2	1	3	1	1	2	2
0	1	2	1	1	2	1	2	2
0	2	1	1	1	2	2	2	2
0	1	2	1	1	1	1	3	2
0	2	1	1	1	2	1	2	2
0	2	2	1	1	1	1	2	2
0	2	1	1	1	2	1	2	2
0	2	2	1	1	2	1	2	1
0	2	1	1	3	1	1	3	3
0	2	1	1	2	1	1	2	2
1	1	1	1	1	1	1	2	2
0	2	1	1	1	1	1	2	2
0	1	2	1	1	2	1	2	2
0	2	1	1	2	1	1	2	2
1	1	2	1	1	1	1	2	1
0	1	1	1	1	2	1	2	2
1	2	1	1	1	2	1	2	1
0	2	2	1	1	2	1	2	2
0	2	1	1	2	1	1	2	2
1	1	1	1	1	1	1	2	2
0	2	3	1	1	1	2	1	2
0	2	3	1	3	2	1	2	2
0	1	3	1	3	2	2	1	1
0	1	3	1	1	1	1	2	2
1	2	3	1	1	1	2	2	1
0	2	3	1	1	1	1	3	2
0	2	1	1	1	1	1	2	2
0	2	3	1	1	2	2	1	1
0	1	3	1	1	1	1	2	2
0	1	1	1	2	1	1	1	2
0	2	3	1	1	1	1	2	1
0	2	3	1	1	1	1	3	2
0	2	3	1	1	1	2	2	2
0	2	3	1	1	1	1	2	2
1	1	1	1	2	1	2	2	2
0	2	3	1	3	1	1	2	2
0	2	3	1	1	1	1	2	2
0	2	3	1	1	2	1	2	2
0	1	3	1	1	1	1	2	2
0	2	3	1	2	1	1	3	2
0	2	3	1	1	1	1	2	2
1	1	1	1	1	1	1	2	2
0	1	2	1	1	1	1	2	2
0	2	3	1	1	2	1	2	1
0	2	3	1	1	1	1	2	2
0	2	3	1	1	1	1	2	2
0	2	3	1	3	1	1	2	2
0	2	3	1	2	2	1	2	1
0	2	3	1	2	1	1	2	1
0	2	3	1	1	1	1	2	1
0	1	3	1	1	1	1	2	2
0	2	3	1	2	2	1	2	2
0	2	3	1	2	2	1	2	1
0	2	3	1	1	1	1	2	2
0	2	3	1	2	1	1	2	2
0	1	3	1	2	1	1	2	2
0	2	3	1	1	1	1	2	2
0	2	3	1	2	1	1	2	2
0	2	3	1	1	1	1	2	2
0	2	1	1	2	1	1	2	2
0	2	3	1	1	2	1	2	2
1	2	3	1	2	1	1	2	2
1	2	2	1	2	1	1	2	2
1	2	2	1	1	1	1	2	2
1	1	1	1	2	1	1	3	2
0	1	2	1	1	1	1	2	2
0	1	3	1	3	1	1	2	3
0	2	1	1	1	1	1	3	2
1	1	1	1	3	1	1	2	2
0	1	1	1	3	1	1	2	2
0	2	1	1	3	1	1	2	2
0	2	1	1	1	1	1	2	2
0	1	2	1	1	1	1	2	2
1	1	1	1	2	1	1	2	3
0	1	1	1	1	1	1	2	2
0	2	1	1	1	1	1	2	2
0	2	1	1	2	2	1	2	2
0	2	1	1	2	1	1	2	2
0	1	1	1	1	2	2	3	1
0	1	1	1	1	2	1	2	2
0	2	1	1	1	2	2	1	1
1	1	3	2	1	1	1	2	2
1	1	1	2	1	2	2	2	2
1	2	3	2	2	2	1	3	2
1	2	1	2	3	1	2	2	2
0	2	3	2	1	2	1	2	1
0	1	3	2	3	1	1	2	2
0	1	3	2	1	2	1	2	2
0	2	3	2	1	1	1	2	2

## Sheet: Knowledge scores
What is menstruation?	What is the cause of menstruation?	From which organ does menstrual blood comes?	What is the duration of normal menstruation, in normal person?	Did anyone tell you about menstruation before you started menstruating?	Do you think there is foul odor during menstruation	Do you think menstrual blood is unhygienic?	Total	KnowledgeCAT
1	0	0	1	1	0	0	3	Poor knowledge
1	1	1	1	1	1	0	6	Good knowledge
1	1	0	1	1	1	0	5	Good knowledge
1	1	0	1	1	0	0	4	Good knowledge
0	0	1	0	0	0	1	2	Poor knowledge
1	1	0	1	1	1	0	5	Good knowledge
1	1	0	0	1	0	1	4	Good knowledge
1	1	1	1	1	1	1	7	Good knowledge
1	1	0	0	0	1	1	4	Good knowledge
1	1	0	1	1	1	0	5	Good knowledge
1	1	0	0	1	1	0	4	Good knowledge
1	1	0	0	1	1	0	4	Good knowledge
1	1	0	1	1	1	1	6	Good knowledge
1	1	0	0	1	1	1	5	Good knowledge
1	0	0	0	0	0	1	2	Poor knowledge
1	0	0	1	0	0	1	3	Poor knowledge
1	1	0	1	1	0	0	4	Good knowledge
1	1	0	1	1	0	1	5	Good knowledge
1	1	0	1	1	1	0	5	Good knowledge
1	1	0	1	1	1	0	5	Good knowledge
1	1	0	0	1	1	1	5	Good knowledge
1	0	0	1	1	1	1	5	Good knowledge
1	1	0	1	1	1	1	6	Good knowledge
0	0	0	0	1	1	1	3	Poor knowledge
1	1	0	1	1	1	1	6	Good knowledge
1	1	0	0	1	1	0	4	Good knowledge
1	0	0	1	1	1	0	4	Good knowledge
1	1	0	1	1	0	1	5	Good knowledge
0	0	0	1	0	1	1	3	Poor knowledge
1	1	0	1	1	0	0	4	Good knowledge
1	0	0	1	1	1	1	5	Good knowledge
1	1	0	1	0	1	1	5	Good knowledge
1	1	0	1	0	1	1	5	Good knowledge
1	1	0	1	1	1	1	6	Good knowledge
1	1	0	0	0	1	0	3	Poor knowledge
1	1	0	0	1	0	1	4	Good knowledge
1	1	0	0	0	1	0	3	Poor knowledge
1	1	0	0	1	0	1	4	Good knowledge
1	1	0	1	1	1	0	5	Good knowledge
1	1	0	1	1	1	0	5	Good knowledge
1	0	1	0	0	1	1	4	Good knowledge
1	1	0	1	1	1	0	5	Good knowledge
0	0	0	0	0	0	0	0	Poor knowledge
1	1	0	0	1	1	0	4	Good knowledge
1	1	0	0	1	0	0	3	Poor knowledge
1	1	0	0	1	1	0	4	Good knowledge
1	0	0	1	1	1	0	4	Good knowledge
1	1	0	1	1	0	0	4	Good knowledge
1	1	0	1	0	1	0	4	Good knowledge
1	0	0	1	1	1	0	4	Good knowledge
1	1	0	0	0	1	1	4	Good knowledge
1	1	0	1	1	0	0	4	Good knowledge
0	0	0	0	0	1	0	1	Poor knowledge
1	1	0	0	1	1	0	4	Good knowledge
0	0	0	1	1	1	1	4	Good knowledge
1	0	0	1	1	1	0	4	Good knowledge
1	1	0	0	1	1	1	5	Good knowledge
0	0	0	1	1	0	0	2	Poor knowledge
0	0	0	1	1	1	0	3	Poor knowledge
1	1	0	0	1	1	1	5	Good knowledge
0	0	0	0	1	0	0	1	Poor knowledge
1	1	0	0	1	1	0	4	Good knowledge
1	1	0	0	1	1	0	4	Good knowledge
1	1	0	0	0	1	0	3	Poor knowledge
1	1	0	0	1	1	0	4	Good knowledge
1	0	0	0	1	1	0	3	Poor knowledge
1	1	0	1	1	1	1	6	Good knowledge
0	0	0	1	1	1	0	3	Poor knowledge
1	1	0	0	1	0	0	3	Poor knowledge
1	1	0	1	1	1	0	5	Good knowledge
1	1	0	0	1	1	0	4	Good knowledge
1	1	0	1	0	1	0	4	Good knowledge
1	1	0	1	1	1	0	5	Good knowledge
1	1	0	1	1	1	0	5	Good knowledge
1	1	0	1	1	1	0	5	Good knowledge
0	0	0	0	1	1	0	2	Poor knowledge
1	1	0	0	1	1	0	4	Good knowledge
1	0	0	1	1	1	0	4	Good knowledge
1	1	0	0	1	1	0	4	Good knowledge
1	1	1	1	1	1	0	6	Good knowledge
1	1	0	1	0	1	1	5	Good knowledge
1	1	0	0	1	0	0	3	Poor knowledge
0	0	0	1	0	1	1	3	Poor knowledge
1	0	0	1	1	1	0	4	Good knowledge
1	1	0	0	1	1	0	4	Good knowledge
1	1	0	1	1	1	0	5	Good knowledge
1	1	0	0	1	1	1	5	Good knowledge
1	0	0	1	1	1	1	5	Good knowledge
1	1	0	0	1	0	0	3	Poor knowledge
0	0	0	1	1	1	1	4	Good knowledge
1	1	0	0	1	1	0	4	Good knowledge
1	0	0	1	1	1	0	4	Good knowledge
1	1	0	1	1	1	0	5	Good knowledge
1	1	0	1	0	1	1	5	Good knowledge
0	1	0	0	1	1	1	4	Good knowledge
0	0	0	1	1	1	0	3	Poor knowledge
1	1	0	1	1	0	0	4	Good knowledge
1	0	0	1	1	1	0	4	Good knowledge
1	1	0	0	1	0	1	4	Good knowledge
1	0	0	0	1	1	0	3	Poor knowledge
1	1	0	0	0	1	1	4	Good knowledge
1	0	0	1	1	1	0	4	Good knowledge
1	1	0	1	1	1	0	5	Good knowledge
1	1	0	0	1	1	0	4	Good knowledge
0	0	0	0	1	1	1	3	Poor knowledge
0	1	0	1	1	0	0	3	Poor knowledge
1	1	0	0	0	0	0	2	Poor knowledge
1	1	0	1	1	1	0	5	Good knowledge
1	0	0	0	1	1	0	3	Poor knowledge
1	1	0	1	1	1	1	6	Good knowledge
1	1	0	0	1	1	1	5	Good knowledge
1	0	0	1	0	0	1	3	Poor knowledge
0	0	0	0	0	1	0	1	Poor knowledge
1	0	0	0	1	1	0	3	Poor knowledge
1	1	0	1	1	1	1	6	Good knowledge
1	1	0	1	1	1	1	6	Good knowledge
1	1	0	1	1	1	1	6	Good knowledge
1	1	0	0	1	1	1	5	Good knowledge
1	1	0	0	1	1	1	5	Good knowledge
1	1	0	0	1	0	1	4	Good knowledge
1	1	0	1	1	1	1	6	Good knowledge
1	1	1	1	1	0	1	6	Good knowledge
1	1	0	0	1	1	1	5	Good knowledge
1	1	0	0	1	0	1	4	Good knowledge
1	0	0	0	1	1	1	4	Good knowledge
1	1	0	1	1	1	0	5	Good knowledge
1	1	0	0	1	1	0	4	Good knowledge
1	1	0	0	1	1	0	4	Good knowledge
1	1	0	1	1	1	1	6	Good knowledge
1	0	0	1	1	0	0	3	Poor knowledge
1	1	0	1	1	1	1	6	Good knowledge
1	0	0	0	1	0	0	2	Poor knowledge
1	1	0	1	1	1	0	5	Good knowledge
1	0	0	1	1	0	1	4	Good knowledge
1	1	0	1	0	0	0	3	Poor knowledge
0	1	0	1	1	1	0	4	Good knowledge
1	1	0	0	1	1	1	5	Good knowledge
1	1	0	0	1	0	1	4	Good knowledge
1	1	0	1	1	1	0	5	Good knowledge
1	1	0	0	1	0	0	3	Poor knowledge
1	1	0	0	1	1	0	4	Good knowledge
1	1	0	0	1	1	1	5	Good knowledge
1	1	0	0	1	1	1	5	Good knowledge
1	1	0	1	1	1	1	6	Good knowledge
1	1	0	1	1	0	1	5	Good knowledge
1	1	0	1	1	1	0	5	Good knowledge
1	1	0	0	1	0	1	4	Good knowledge
1	1	0	1	1	1	0	5	Good knowledge
1	1	0	1	1	1	0	5	Good knowledge
1	1	0	1	1	1	0	5	Good knowledge
1	1	0	0	1	1	0	4	Good knowledge
1	1	0	1	0	0	0	3	Poor knowledge
1	1	0	0	1	0	0	3	Poor knowledge
1	1	0	1	1	1	1	6	Good knowledge
1	1	0	0	1	1	0	4	Good knowledge
1	1	0	0	1	0	0	3	Poor knowledge
1	1	0	0	1	1	0	4	Good knowledge
1	1	0	1	0	0	0	3	Poor knowledge
1	1	1	1	1	0	1	6	Good knowledge
1	0	0	1	1	1	1	5	Good knowledge
1	1	0	1	1	0	0	4	Good knowledge
1	1	0	0	0	1	0	3	Poor knowledge
1	1	0	1	0	1	0	4	Good knowledge
1	0	0	1	1	0	1	4	Good knowledge
1	1	0	1	0	1	0	4	Good knowledge
1	1	0	0	1	1	0	4	Good knowledge
1	1	0	1	1	1	1	6	Good knowledge
1	1	0	1	1	0	0	4	Good knowledge
1	0	0	0	0	0	1	2	Poor knowledge
1	1	0	1	1	1	0	5	Good knowledge
1	1	0	0	1	0	0	3	Poor knowledge
1	1	0	1	1	0	1	5	Good knowledge
1	1	0	0	0	1	1	4	Good knowledge
1	1	0	1	1	1	0	5	Good knowledge
1	0	0	0	0	1	1	3	Poor knowledge
1	1	0	1	0	1	0	4	Good knowledge
1	1	0	0	1	1	0	4	Good knowledge
1	1	0	0	0	1	0	3	Poor knowledge
1	1	0	1	1	0	0	4	Good knowledge
1	1	0	1	1	1	0	5	Good knowledge
1	0	0	0	1	0	0	2	Poor knowledge
1	1	1	1	1	1	1	7	Good knowledge
1	1	0	1	1	0	0	4	Good knowledge
1	1	0	0	1	0	0	3	Poor knowledge
1	1	0	1	1	1	0	5	Good knowledge
1	1	0	1	0	1	0	4	Good knowledge
1	0	0	1	1	1	1	5	Good knowledge
1	1	0	1	1	1	1	6	Good knowledge
1	0	0	1	1	1	1	5	Good knowledge
1	1	1	0	1	1	1	6	Good knowledge
1	1	0	1	1	1	1	6	Good knowledge
1	0	0	0	1	1	1	4	Good knowledge
1	1	0	1	1	1	0	5	Good knowledge
1	1	0	1	1	1	1	6	Good knowledge
1	1	0	1	1	1	0	5	Good knowledge
1	1	0	0	1	0	0	3	Poor knowledge
1	1	0	1	1	1	1	6	Good knowledge
1	1	0	0	1	0	1	4	Good knowledge
1	1	0	1	1	1	0	5	Good knowledge
0	0	0	1	1	1	1	4	Good knowledge
1	1	0	1	1	1	0	5	Good knowledge
1	1	0	0	1	0	1	4	Good knowledge
1	1	0	1	1	1	1	6	Good knowledge
1	1	0	1	1	0	0	4	Good knowledge
1	1	0	0	1	1	0	4	Good knowledge
1	1	0	0	1	0	0	3	Poor knowledge
1	1	0	1	1	1	0	5	Good knowledge
1	1	0	1	1	1	0	5	Good knowledge
1	1	0	1	1	1	0	5	Good knowledge
1	1	0	0	0	0	0	2	Poor knowledge
1	1	0	1	1	1	0	5	Good knowledge
1	1	0	0	1	0	0	3	Poor knowledge
1	1	0	0	1	1	0	4	Good knowledge
1	1	0	1	1	1	0	5	Good knowledge
1	1	0	0	1	1	0	4	Good knowledge
1	1	0	1	1	0	0	4	Good knowledge
1	1	0	1	0	0	0	3	Poor knowledge
1	1	0	1	1	0	0	4	Good knowledge
1	1	0	0	1	1	1	5	Good knowledge
1	1	0	0	1	1	0	4	Good knowledge
1	1	1	0	1	1	1	6	Good knowledge
1	1	0	0	1	1	0	4	Good knowledge
1	1	0	1	1	1	0	5	Good knowledge
1	1	0	0	1	1	1	5	Good knowledge
1	1	0	0	1	1	1	5	Good knowledge
1	1	0	1	1	1	0	5	Good knowledge
1	1	0	0	1	1	1	5	Good knowledge
1	1	0	1	1	1	1	6	Good knowledge
1	1	0	0	1	0	0	3	Poor knowledge
1	1	0	1	1	1	1	6	Good knowledge
1	1	0	0	1	1	1	5	Good knowledge
1	1	0	1	1	1	1	6	Good knowledge
1	1	0	0	1	1	1	5	Good knowledge
1	1	0	0	1	1	0	4	Good knowledge
0	1	0	1	1	1	1	5	Good knowledge
1	1	0	1	1	1	1	6	Good knowledge
1	1	0	1	1	0	0	4	Good knowledge
1	1	0	1	1	0	0	4	Good knowledge
1	1	0	1	1	0	0	4	Good knowledge
1	1	0	0	1	1	0	4	Good knowledge
0	1	0	0	0	1	0	2	Poor knowledge
1	1	0	1	1	0	0	4	Good knowledge
1	1	0	1	1	1	0	5	Good knowledge
1	1	0	1	1	1	0	5	Good knowledge
0	0	0	0	1	1	1	3	Poor knowledge
1	1	0	0	0	1	0	3	Poor knowledge
1	1	0	1	1	1	1	6	Good knowledge
1	1	0	1	1	1	1	6	Good knowledge
1	1	0	0	1	0	1	4	Good knowledge
1	1	0	1	0	0	0	3	Poor knowledge
1	1	0	1	0	1	1	5	Good knowledge
1	1	1	1	1	0	0	5	Good knowledge
1	1	0	1	0	0	0	3	Poor knowledge
1	1	0	0	1	0	1	4	Good knowledge
1	1	0	1	1	1	0	5	Good knowledge
1	1	0	0	0	1	0	3	Poor knowledge
1	1	1	1	1	1	0	6	Good knowledge
1	1	0	0	1	1	0	4	Good knowledge
1	1	0	0	0	1	0	3	Poor knowledge
1	1	0	0	1	0	1	4	Good knowledge
1	1	0	1	1	1	0	5	Good knowledge
1	1	0	1	1	0	0	4	Good knowledge
1	1	0	0	1	0	0	3	Poor knowledge
0	1	0	1	1	1	0	4	Good knowledge
0	0	0	0	1	1	0	2	Poor knowledge
0	0	0	1	1	0	0	2	Poor knowledge
1	1	0	1	1	1	0	5	Good knowledge
1	1	0	0	1	1	0	4	Good knowledge
1	1	0	0	1	1	0	4	Good knowledge
1	1	0	1	1	1	1	6	Good knowledge
1	1	1	1	1	1	0	6	Good knowledge
1	1	0	1	1	1	0	5	Good knowledge
1	1	1	1	0	1	1	6	Good knowledge
1	1	0	1	1	1	1	6	Good knowledge
1	1	0	1	1	0	0	4	Good knowledge
0	0	0	1	1	0	1	3	Poor knowledge
1	1	0	1	1	1	0	5	Good knowledge
1	1	0	0	1	1	0	4	Good knowledge
0	1	0	1	1	0	1	4	Good knowledge
1	1	0	0	1	1	0	4	Good knowledge
1	1	0	0	1	1	0	4	Good knowledge
1	1	0	1	1	1	1	6	Good knowledge
1	1	0	0	1	1	0	4	Good knowledge
1	1	0	0	1	1	1	5	Good knowledge
1	1	0	1	1	1	0	5	Good knowledge
1	1	0	0	1	0	1	4	Good knowledge
1	1	0	1	1	1	1	6	Good knowledge
1	1	0	1	1	1	0	5	Good knowledge
1	1	0	1	1	1	0	5	Good knowledge
1	1	0	1	1	1	1	6	Good knowledge
0	0	0	0	0	1	1	2	Poor knowledge
1	0	0	0	1	0	1	3	Poor knowledge
1	1	0	1	1	1	0	5	Good knowledge
1	1	0	0	1	1	1	5	Good knowledge
1	1	0	1	1	1	1	6	Good knowledge
1	1	0	1	1	1	0	5	Good knowledge
1	1	0	1	1	1	0	5	Good knowledge
1	1	0	1	1	0	0	4	Good knowledge
1	1	0	1	1	1	0	5	Good knowledge
1	1	0	1	1	1	0	5	Good knowledge
1	1	0	0	1	1	1	5	Good knowledge
1	1	0	0	0	0	1	3	Poor knowledge
1	1	0	1	0	0	0	3	Poor knowledge
1	1	0	1	1	1	0	5	Good knowledge
1	1	0	0	1	0	1	4	Good knowledge
1	1	0	1	1	1	1	6	Good knowledge
1	1	0	1	1	1	1	6	Good knowledge
1	1	0	0	1	1	1	5	Good knowledge
1	1	0	0	0	0	0	2	Poor knowledge
1	1	0	1	1	1	1	6	Good knowledge
1	1	0	0	1	0	1	4	Good knowledge
1	0	0	0	1	1	1	4	Good knowledge
0	0	0	0	0	0	1	1	Poor knowledge
0	0	1	0	0	1	0	2	Poor knowledge
1	0	0	1	1	1	0	4	Good knowledge
1	1	0	0	1	1	0	4	Good knowledge
1	1	0	0	0	1	0	3	Poor knowledge
1	1	0	1	1	1	0	5	Good knowledge
1	1	0	0	1	0	0	3	Poor knowledge
1	1	0	1	1	1	1	6	Good knowledge
1	1	0	0	1	0	1	4	Good knowledge
1	1	0	1	1	1	0	5	Good knowledge
0	0	0	1	1	1	1	4	Good knowledge
1	1	0	1	1	1	0	5	Good knowledge
1	1	0	0	1	0	1	4	Good knowledge
1	1	0	1	1	1	1	6	Good knowledge
1	1	0	1	1	0	0	4	Good knowledge
1	1	0	0	1	1	0	4	Good knowledge
1	1	0	0	1	0	0	3	Poor knowledge
1	1	0	1	1	1	0	5	Good knowledge
1	0	0	1	1	1	1	5	Good knowledge
1	1	0	1	1	1	1	6	Good knowledge
1	0	0	1	1	1	1	5	Good knowledge
1	1	1	0	1	1	1	6	Good knowledge
1	1	0	1	1	1	1	6	Good knowledge
1	0	0	0	1	1	1	4	Good knowledge
1	1	0	1	1	1	0	5	Good knowledge
1	1	0	1	1	1	1	6	Good knowledge
1	1	0	1	1	1	0	5	Good knowledge
1	1	0	0	1	0	0	3	Poor knowledge
1	1	0	1	1	1	1	6	Good knowledge
1	1	0	0	1	0	1	4	Good knowledge
1	1	0	1	1	1	0	5	Good knowledge
0	0	0	1	1	1	1	4	Good knowledge
1	1	0	1	1	1	0	5	Good knowledge
1	1	0	0	1	0	1	4	Good knowledge
1	1	0	1	1	1	1	6	Good knowledge
1	1	0	1	1	0	0	4	Good knowledge
1	1	0	0	1	1	0	4	Good knowledge
1	1	0	0	1	0	0	3	Poor knowledge
1	1	0	1	1	1	0	5	Good knowledge
1	1	0	1	1	1	0	5	Good knowledge
1	1	0	1	1	1	0	5	Good knowledge
1	1	0	0	0	0	0	2	Poor knowledge
1	1	0	1	1	1	0	5	Good knowledge
1	1	0	0	1	0	0	3	Poor knowledge
1	1	0	0	1	1	0	4	Good knowledge
1	1	0	1	1	1	0	5	Good knowledge
1	1	0	0	1	1	0	4	Good knowledge
1	1	0	1	1	0	0	4	Good knowledge
1	1	0	1	0	0	0	3	Poor knowledge
1	1	0	1	1	0	0	4	Good knowledge
1	1	0	0	1	1	1	5	Good knowledge
